# Supplementary material for: Tralokinumab Provides Clinically Meaningful Responses at Week 16 in Adults with Moderate-to-Severe Atopic Dermatitis Who Do Not Achieve IGA 0/1
Source: Springer Nature journal article supplement (doi:10.1007/s40257-023-00817-0), 2023-10-07
Supplement: MOESM1 [file 26139082]

## Supporting Information

**Supplement to article titled:** Tralokinumab provides clinically meaningful responses at Week 16 in adults with moderate-to-severe atopic dermatitis who do not achieve IGA 0/1.

**Journal:** *American Journal of Clinical Dermatology (AJCD)*

**Authors:** Eric L Simpson<sup>1</sup>, Andrew Blauvelt<sup>2</sup>, Jonathan I Silverberg<sup>3</sup>, Michael J Cork<sup>4</sup>, Norito Katoh<sup>5</sup>, Thomas Mark<sup>6</sup>, Shannon KR Schneider<sup>7</sup>, Andreas Wollenberg<sup>8,9</sup>

**Affiliations:** <sup>1</sup>Department of Dermatology, Oregon Health & Science University, Portland, OR, USA; <sup>2</sup>Oregon Medical Research Center, Portland, OR, USA; <sup>3</sup>Department of Dermatology, George Washington School of Medicine and Health Sciences, Washington DC, USA; <sup>4</sup>Sheffield Dermatology Research, IICD, University of Sheffield, Sheffield, UK; <sup>5</sup>Department of Dermatology, Kyoto Prefectural University of Medicine Graduate School of Medical Science, Kyoto, Japan; <sup>6</sup>LEO Pharma A/S, Ballerup, Denmark; <sup>7</sup>LEO Pharma Inc., Madison, NJ, USA; <sup>8</sup>Department of Dermatology and Allergy, Ludwig Maximilian University of Munich, Munich, Germany; <sup>9</sup>Department of Dermatology and Allergy, University Hospital Augsburg, Augsburg, Germany

**Corresponding author:** Andreas Wollenberg, MD  
Email: [wollenberg@lrz.uni-muenchen.de](mailto:wollenberg@lrz.uni-muenchen.de)

## Acknowledgements

The ECZTRA 1 and 2 clinical trials were sponsored by LEO Pharma A/S (Ballerup, Denmark). Medical writing support, including assisting authors with the development of the manuscript drafts and incorporation of comments, was provided by Matthew Hartmann, PhD and Clair Geary, PhD of Alphabet Health (New York, NY), supported by LEO Pharma A/S (Ballerup, Denmark), according to Good Publication Practice guidelines (<https://www.ismpp.org/gpp-2022>). The authors received no honoraria related to the development of this publication.

## Declarations

### I. Funding

The ECZTRA 1 and 2 clinical trials were sponsored by LEO Pharma A/S (Ballerup, Denmark).

### II. Conflicts of interest/Competing interests

**Eric L Simpson** reports personal fees from AbbVie, Amgen, Arena Pharmaceuticals, Aslan Pharma, Benevolent AI Bio Limited "BAI", BiomX Ltd, Bluefin Biomedicine Inc, Boehringer-Ingelheim, Boston Consulting Group, Collective Acumen, LLC (CA), Coronado, Dermira, Eli Lilly, Evidera, ExcerptaMedica, Galderma, GlaxoSmithKline, Forte Bio RX, Incyte Dermatologics, Janssen, Kyowa Kirin Pharmaceutical Development, Leo Pharm, Medscape LLC, Merck, Novartis, Ortho Galderma, Pfizer, Physicians World LLC, Pierre Fabre Dermo Cosmetique, Regeneron, Roivant, Sanofi- Genzyme, SPARC India, Trevi therapeutics, WebMD and Valeant; reports grants (or served as Principal Investigator role) from AbbVie, Amgen, Arcutis, Aslan, Castle Biosciences, Inc Celegene, CorEviitas, Dermavant, Dermira, Eli Lilly, Galderma, Incyte, Kymab, Kyowa Hakko Kirin, Leo Pharmaceuticals, Merck, Novartis, Pfizer, Regeneron, Sanofi, and TARGET-DERM. **Andrew Blauvelt** has served as a speaker (received honoraria) for AbbVie, Bristol-Myers Squibb, Eli Lilly and Company, Pfizer, Regeneron, and

Sanofi, served as a scientific adviser (received honoraria) for AbbVie, Abcentra, Aclaris, Affibody, Aligos, Almirall, Alumis, Amgen, Anaptysbio, Arcutis, Arena, Aslan, Athenex, Bluefin Biomedicine, Boehringer Ingelheim, Bristol-Myers Squibb, Cara Therapeutics, Dermavant, EcoR1, Eli Lilly and Company, Escient, Evelo, Evommune, Forte, Galderma, HighlightII Pharma, Incyte, InnoventBio, Janssen, Landos, LEO Pharma, Merck, Novartis, Pfizer, Rani, Rapt, Regeneron, Sanofi Genzyme, Spherix Global Insights, Sun Pharma, TLL Pharmaceutical, TrialSpark, UCB Pharma, Union, Vibliome, and Xencor, and has acted as a clinical study investigator (institution has received clinical study funds) for AbbVie, Acelyrin, Allakos, Almirall, Alumis, Amgen, Arcutis, Athenex, Boehringer Ingelheim, Bristol-Myers Squibb, Concert, Dermavant, Eli Lilly and Company, Evelo, Evommune, Galderma, Incyte, Janssen, LEO Pharma, Merck, Novartis, Pfizer, Regeneron, Sun Pharma, UCB Pharma, and Ventyx.

**Jonathan I Silverberg** reports honoraria as a consultant/advisory board member from LEO Pharma and has acted as a consultant for and/or received grants/honoraria from AbbVie, AnaptysBio, Asana Biosciences, Galderma Research and Development, GSK, Glenmark, Kiniksa, LEO Pharma, Lilly, MedImmune, Menlo Therapeutics, Pfizer, PuriCore, Regeneron, and Sanofi. **Michael J Cork** has served as a clinical trial investigator for Astellas, Galapagos, Johnson & Johnson, LEO Pharma, La Roche-Posay, MSD, Novartis, Perrigo, Regeneron, Sanofi Genzyme, and Stiefel; has served as an advisory board member, consultant, and/or invited lecturer for Pfizer Inc., Amgen, Astellas, Bayer, Johnson & Johnson, LEO Pharma, L'Oréal, MSD, Novartis, Regeneron, Sanofi Genzyme, Stiefel, and Unilever; has received honoraria from Astellas, Johnson & Johnson, LEO Pharma, Novartis, Regeneron, Sanofi Genzyme, and Stiefel; and has received research funding from Bayer. **Norito Katoh** has received honoraria as a speaker/consultant for Sanofi, Maruho, Abbvie, Ely-Lilly Japan, Taiho Pharmaceutical, Torii Pharmaceutical, and LEO Pharma, and has received grants as an investigator from Maruho, Ely-Lilly Japan, Sun Pharma, Taiho Pharmaceutical, Torii Pharmaceutical, Boehringer Ingelheim Japan, Kyowa Kirin, Jansen Pharma, Boehringer Ingelheim Japan, Abbvie, and LEO Pharma. **Thomas Mark** was an employee and stockholder of LEO Pharma A/S when conducting the data analyses for this publication. **Shannon KR Schneider** is an employee of LEO Pharma Inc. **Andreas Wollenberg** has received grants, personal fees, or nonfinancial support from AbbVie, Almirall, Aileens, Beiersdorf, Bioderma, BMS, Chugai, Galapagos, Galderma, GSK, Hans Karrer, Janssen, LEO Pharma, Lilly, L'Oreal, Maruho, MedImmune, Novartis, Pfizer, Pierre Fabre, Regeneron, Santen, and Sanofi-Aventis.

### III. Availability of data and material

Data will be made available, upon request to the study sponsor, following review by the external Patient and Scientific Review Board.

### IV. Ethic approval

The ECZTRA 1 and 2 trials were sponsored by LEO Pharma A/S (Ballerup, Denmark) and conducted in accordance with the ethical principles derived from international guidelines including the Declaration of Helsinki and Council for International Organizations of Medical Sciences International Ethical Guidelines and in compliance with International Council for Harmonisation guidelines for Good Clinical Practice. The clinical trial was approved by institutional review boards or ethics committees at each study site. This trial followed the Consolidated Standards of Reporting Trials reporting guideline.

### V. Consent to participate

All patients provided written informed consent.

### VI. Consent for publication

N/A

**VII. Code availability**

N/A

**VIII. Author contributions**

Conceptualization: All authors contributed equally; Investigation: All authors contributed equally; Data curation: Thomas Mark (lead); Formal analysis: Thomas Mark (lead); Methodology: Thomas Mark (equal), Shannon KR Schneider (equal); Writing: All authors contributed equally; Review/Editing: All authors contributed equally. All authors read and approved the final version of the manuscript.

**The authors have provided this Supporting Information to provide readers additional information about their work.**

## Contents

### Ethical approval information S1

**Fig. 1** ECZTRA 1 and 2 trial design

**Table S1** Baseline characteristics for ECZTRA 1 and 2 non-responders at Week 16 split by achievement of at least one clinically meaningful response

**Table S2** Week 16 outcomes for ECZTRA 1 and 2 non-responders at Week 16

### Results per United States Prescribing Information (USPI)

**Table S3** Baseline characteristics for ECZTRA 1 and 2 responders (IGA 0/1 without rescue medication) versus non-responders at Week 16 (USPI population)

**Table S4** Baseline characteristics for ECZTRA 1 and 2 non-responders at Week 16 split by achievement of at least one clinically meaningful response (USPI population)

**Table S5** Week 16 outcomes for ECZTRA 1 and 2 non-responders at Week 16 (USPI population)

**Fig. S2** Greater proportion of tralokinumab-treated patients achieved clinically meaningful responses relative to placebo at Week 16 (USPI population)

**Fig. S3** Greater proportion of tralokinumab-treated patients achieved all three measures of clinically meaningful response relative to placebo at Week 16 (USPI population)

**Fig. S4** Greater proportion of tralokinumab-treated patients achieved EASI-75, EASI-90,  $\geq 3$ -point improvement in sleep NRS, and DLQI  $\leq 5$  relative to placebo at Week 16 (USPI population)

## Ethical approval information S1

## ECZTRA 1

## FRANCE

| IEC/IRB Committee<br>Chair and Name of Committee:                                    | Investigator / Site                                   |
|--------------------------------------------------------------------------------------|-------------------------------------------------------|
| Chair: Mr David Simhon/ Pierre Lourlegue<br>Central Committee<br>CPP Ile de France 3 | Dr. M. Ruer Mulard<br>Cabinet Médical                 |
|                                                                                      | Prof. Dr. F. Cambazard<br>CHU de Saint-Etienne        |
|                                                                                      | Prof. dr. P. Modiano<br>Hôpital Saint Vincent de Paul |
|                                                                                      | Prof. dr. J. Lacour<br>CHU de Nice                    |
|                                                                                      | Prof. dr. J. Seneschal<br>Hopital Saint-André         |
|                                                                                      | Prof.dr. L. Misery<br>CHRU de Brest - Hôpital Morvan  |
|                                                                                      | Prof. C. Paul<br>Hôpital Larrey                       |
|                                                                                      | Dr. F. Skowron<br>Centre Hospitalier de Valence       |
|                                                                                      | Dr. B. Bonniaud<br>CHU de Dijon                       |
|                                                                                      | Dr. S. Barbarot<br>CHU de Nantes                      |
|                                                                                      | Dr. M. Viguier<br>CHU de Reims                        |
|                                                                                      | Dr. C. Michel<br>Hôpital Emile Muller                 |
|                                                                                      | Dr. A. Duval-Modeste<br>Hopital Charles Nicolle       |

|  |                                               |
|--|-----------------------------------------------|
|  | <b>Dr. D. Staumont-Sallé</b><br>CHRU de Lille |
|--|-----------------------------------------------|

## GERMANY

| <b>IEC/IRB Committee</b><br><b>Chair and Name of Committee: Chair:</b>                                                                                                                                                 | <b>Investigator / Site</b>                                                    |
|------------------------------------------------------------------------------------------------------------------------------------------------------------------------------------------------------------------------|-------------------------------------------------------------------------------|
| <b>Prof. Dr. W. Eisenmenger</b><br>Ethikkommission bei der LMU München Pettenkoferstr. 8a<br>80336 München                                                                                                             | <b>Prof. dr. A. Wollenberg</b><br>LMU Derma<br><b>ID# 17-189</b>              |
| <b>Chair: N/A</b><br>Technische Universität Dresden Ethikkommission an der<br>TU Dresden Fetscherstrasse 74<br>01307 Dresden                                                                                           | <b>Prof. dr. S. Beisert</b><br>Uniklinikum Dresden                            |
| <b>Chair: Prof. Dr. Med. E. Berdel</b><br>Ethikkommission der Ärztekammer Westfalen- Lippe und<br>der Medizinischen Fakultät der Westfälischen Wilhelms-<br>Universität Münster Gartenstarsse 210-214<br>48147 Münster | <b>Dr. R. Dominicus</b><br>Pro Derma Hautzentrum Dülmen                       |
| <b>Chair: Prof. Dr. Med. E. Berdel</b> Ethikkommission der<br>Ärztekammer Westfalen- Lippe und der Medizinischen<br>Fakultät der Westfälischen Wilhelms-Universität Münster<br>Gartenstarsse 210-214<br>48147 Münster  | <b>Prof. dr. I. Effendy</b><br>Klinikum Bielefeld Rosenhöhe                   |
| <b>Chair: Prof. Dr. Peter Kleine</b><br>Ethikkommission bei der Ärztekammer Niedersachsen<br>Berliner Allee 20<br>30175 Hannover                                                                                       | <b>Dr. M. Kaspari</b><br>Hautärzte Zentrum Hannover                           |
| <b>Chair: Prof. Dr. Med. Ulrike Schara</b><br>Ethikkommission der Universität Duisburg- Essen<br>Robert-Koch Strasse 9-11<br>45147 Essen                                                                               | <b>Dr. W. Sondermann</b><br>Dr. A. Körper, end 03-Feb-2018 Uniklinik<br>Essen |

|                                                                                                                                                                                                                                                            |                                                                               |
|------------------------------------------------------------------------------------------------------------------------------------------------------------------------------------------------------------------------------------------------------------|-------------------------------------------------------------------------------|
| <p><b>Chair: Prof. Dr. Med. E. Berdel</b><br/>         Ethikkommission der Ärztekammer Westfale- Lippe und der Medizinischen Fakultät der Westfälischen Wilhelms-Universität Münster Gartenstrasse 210-214<br/>         48147 Münster</p>                  | <p><b>Dr. J. Niesmann</b><br/>         Private clinic</p>                     |
| <p><b>Chair: Prof. Dr. Peter Kleine</b><br/>         Ärztekammer Niedersachsen<br/>         Ethikkommission<br/>         Berliner Allee 20<br/>         30175 Hannover</p>                                                                                 | <p><b>Dr. S. Pauser</b><br/>         KLIFOs Osnabrück</p>                     |
| <p><b>Chair: Alexandra Ewald/ Giesela Gerke</b><br/>         Ethikkommission der Landesärztekammer Hessen<br/>         Im Vogelgesang 3<br/>         60488 Frankfurt</p>                                                                                   | <p><b>Dr. M. Podda</b><br/>         Klinikum Darmstadt</p>                    |
| <p><b>Chair: Irmgard Oßmann/Monika Kretschmer</b><br/>         Landesärztekammer Baden-Württemberg Ethik-Kommission<br/>         Jahnstrasse 40<br/>         70597 Stuttgart</p>                                                                           | <p><b>Dr. P. Radny</b><br/>         Derma Study Center</p>                    |
| <p><b>Chair: Prof. Dr. Franz von Bruchhausen</b><br/>         Landesärztekammer Brandenburg Hauptgeschäftsstelle<br/>         Ethikkommission Dreifertstrasse 12<br/>         03044 Cottbus</p>                                                            | <p><b>Dr. M. Sebastian</b><br/>         Private clinic</p>                    |
| <p><b>Chair: PD Dr. Med. Rudolf Giertler</b><br/>         Landesärztekammer Thüringen Im<br/>         Semmicht 33<br/>         07751 Jena</p>                                                                                                              | <p><b>Dr. S. Sell</b><br/>         SRH Wald-Klinikum Gera</p>                 |
| <p><b>Chair: Prof. Dr. Dr. Ortrun Riha</b><br/>         Geschäftsstelle der Ethikkommission an der Medizinischen Fakultät der Universität Leipzig Käthe-Kollwitz-Strasse 82<br/>         04109 Leipzig</p>                                                 | <p><b>Prof. dr. J. C. Simon</b><br/>         Universitätsklinikum Leipzig</p> |
| <p><b>Chair: <a href="mailto:ethikkommission@fau.de">ethikkommission@fau.de</a></b><br/>         Friedrich-Alexander-Universität Erlangen- Nürnberg<br/>         Geschäftsstelle der Ethikkommission Krankenhausstrasse 12<br/>         91054 Erlangen</p> | <p><b>Prof. M. Sticherling</b><br/>         Universitätsklinikum Erlangen</p> |

|                                                                                                                                                                                                                                                                                 |                                                                                         |
|---------------------------------------------------------------------------------------------------------------------------------------------------------------------------------------------------------------------------------------------------------------------------------|-----------------------------------------------------------------------------------------|
| <p><b>Chair: Prof. Dr. Med. E. Berdel</b><br/>                 Ethikkommission der Ärztekammer Westfalen- Lippe und der Westfälischen Wilhelms- Universität Münster<br/>                 Gartenstrasse 210-214<br/>                 48147 Münster</p>                           | <p><b>Dr. N. Magnolo</b><br/>                 Universitätsklinikum Münster</p>          |
| <p><b>Chair: Prof. Dr. Edeltraud Garde</b><br/>                 Ethikkommission des Landesamt für Gesund- heit und Soziales Berlin<br/>                 Fehrbelliner Platz 1<br/>                 10607 Berlin</p>                                                              | <p><b>Dr. M. Ulrich</b><br/>                 CMB - Collegium Medicum Berlin</p>         |
| <p><b>Chair: Prof. Dr. Th. Weber</b><br/>                 Ethikkommission der Ärztekammer Hamburg Weidestrasse 122b<br/>                 22083 Hamburg</p>                                                                                                                      | <p><b>Dr. P. Weisenseel/Reich</b><br/>                 TFS Trial Form Support GmbH</p>  |
| <p><b>Chair: N/A</b><br/>                 Ethikkommission des Fachbereichs der Lud- wig-Maximilians-Universität München Pettenkoferstrasse 8a<br/>                 80336 München</p>                                                                                            | <p><b>Prof. Dr. J. Welzel</b><br/>                 Klinikum Augsburg Derma</p>          |
| <p><b>Chair: Frau Landowski</b><br/>                 Ethikkommission der Medizinischen Hochschule Hannover<br/>                 Carl-Neuberg-Strasse 1<br/>                 30625 Hannover</p>                                                                                  | <p><b>Prof. Dr. T. Werfel</b><br/>                 Medizinische Hochschule Hannover</p> |
| <p><b>Chair: Beatrice Bühligen/ Kathrin Bunk</b><br/>                 Ethikkommission der Medizinischen Fakultät der Martin-Luther-Universität Halle- Wittenberg<br/>                 Magdeburger Strasse 16<br/>                 06097 Halle</p>                               | <p><b>Prof. Dr. J. Wohlrab</b><br/>                 Uni.&amp;Poliklinik Halle</p>       |
| <p><b>Chair: Dr. Christian von Dewitz</b><br/>                 Landesamt für Gesundheit und Soziales Berlin (LAGeSo)<br/>                 Geschäftsstelle der Ethikkommission des Landes Berlin<br/>                 Fehrbelliner Platz 1<br/>                 10707 Berlin</p> | <p><b>Prof. Dr. M. Worm</b><br/>                 Charité Berlin</p>                     |

**JAPAN**

|                                                                                   |                                   |
|-----------------------------------------------------------------------------------|-----------------------------------|
| <p><b>IEC/IRB Committee</b><br/>                 Chair and Name of Committee:</p> | <p><b>Investigator / Site</b></p> |
|-----------------------------------------------------------------------------------|-----------------------------------|



|                                                                                                                                                                                                       |                                                                               |
|-------------------------------------------------------------------------------------------------------------------------------------------------------------------------------------------------------|-------------------------------------------------------------------------------|
| <p><b>Chair: Yoshiki Suyama</b><br/>(Toshiko Wakabayashi end 17 Dec 2018)</p> <p>Medical Corporation Katoreakai Dr. Mano Medical Clinic Institutional Review Board 1-8-1 Ebisu, Shibuya-ku, Tokyo</p> | <p><b>Dr. H. Sakai</b><br/>Asahikawa City Hospital</p>                        |
| <p><b>Chair: Akira Ohkawara</b></p> <p>Medical Corporation Kojinkai Sapporo Skin Clinic Institutional Review Board<br/>1-1, Nishi 2-chome, Minami 3-jo Chuo-ku, Sapporo-Shi</p>                       | <p><b>Dr. M. Abe</b><br/>Medical Corporation Kojinkai Sapporo Skin Clinic</p> |
| <p><b>Chair: Noriharu Shijubo</b></p> <p>JR Sapporo Hospital IRB Kita 3jo-Higashi 1chome<br/>Chuo-ku, Sapporo-city, Hokkaido</p>                                                                      | <p><b>Dr. K. Ito</b><br/>JR Sapporo Hospital</p>                              |
| <p><b>Chair: Akira Ohkawara</b></p> <p>Medical Corporation Kojinkai Sapporo Skin Clinic Institutional Review Board<br/>1-1, Nishi 2-chome, Minami 3-jo Chuo-ku, Sapporo-Shi</p>                       | <p><b>Dr. H. Takahashi</b><br/>Takagi Dermatological Clinic</p>               |
| <p><b>Chair: Hideyuki Kikuchi</b><br/>(Shinsuke Honjyo end 31 Mar 2018)</p> <p>Joint Institutional Review Board, Iwate Prefectural Hospital<br/>1-4-1 Ueda, Morioka, Iwate</p>                        | <p><b>Dr. Y. Mori</b><br/>Iwate Prefectural Central Hospital</p>              |
| <p><b>Chair: Hiroyuki Suzuki</b><br/>(Yoshiyuki Suzuki end 31 Mar 2018)</p> <p>Fukushima Medical University Hospital Institutional Review Board<br/>1 Hikariga-oka, Fukushima City, Fukushima</p>     | <p><b>Dr. T. Yamamoto</b><br/>Fukushima Medical University Hospital</p>       |
| <p><b>Chair: Tsukasa Ohmori</b><br/>(Mamitaro Ohtsuki end 31 Mar 2018)</p> <p>Institutional Review Board of Jichi Medical University Hospital<br/>3311-1 Yakushiji, Shimotsuke, Tochigi</p>           | <p><b>Dr. M. Komine</b><br/>Jichi Medical University Hospital</p>             |

|                                                                                                                                                                                                          |                                                                                                                                      |
|----------------------------------------------------------------------------------------------------------------------------------------------------------------------------------------------------------|--------------------------------------------------------------------------------------------------------------------------------------|
| <p><b>Chair: Seiji Hori</b></p> <p>Drug Institutional Review Board, The Jikei University Hospital<br/>3-19-18, Nishishimbashi, Minato-ku, Tokyo</p>                                                      | <p><b>Dr. T. Ishiji</b></p> <p>The Jikei University Hospital</p>                                                                     |
| <p><b>Chair: Haruo Hanyu</b></p> <p>Tokyo Medical University Hospital Institutional Review Board<br/>6-7-1 Nishi-shinjuku, Shinjuku-ku, Tokyo</p>                                                        | <p><b>Dr. T. Ito</b></p> <p>Tokyo Medical University Hospital</p>                                                                    |
| <p><b>Chair: Yasuhiro Ishii</b></p> <p>Medical Corporation Foundation Ogikubo Hospital Institutional Review Board<br/>3-1-24 Imagawa, Suginami-ku, Tokyo</p>                                             | <p><b>Dr. Y. Futei</b></p> <p>Ogikubo Hospital</p>                                                                                   |
| <p><b>Chair: Hiroshi Mitsui</b><br/>(Hiroki Hata end 31 Mar 2018)</p> <p>Tokyo Teishin Hospital Institutional Review Board<br/>2-14-23 Fujimi, Chiyoda-ku Tokyo</p>                                      | <p><b>Dr. T. Etoh</b></p> <p>Tokyo Teishin Hospital</p>                                                                              |
| <p><b>Chair: Kensuke Usuki</b></p> <p>NTT Medical Center Tokyo Institutional Review Board<br/>5-9-22 Higashi-Gotanda, Shinagawa-ku Tokyo</p>                                                             | <p><b>Dr. A. Igarashi</b></p> <p>NTT Medical Center Tokyo</p>                                                                        |
| <p><b>Chair: Yoshinobu Saito</b></p> <p>Institutional Review Board Nippon Medical School Hospital 1-1-5 Sendagi, Bunkyo-ku, Tokyo</p>                                                                    | <p><b>Dr. H. Saeki</b></p> <p>Nippon Medical School Hospital</p>                                                                     |
| <p><b>Chair: Teruhiko Nakagawa</b></p> <p>The Fraternity Memorial Hospital Institutional Review Board Yokoami 2-1-11, Sumida-ku, Tokyo</p>                                                               | <p><b>Dr. Y. Kawase</b></p> <p>(Dr. A. Kondo, end 17-Jun-2019) (Dr. H. Mitsui, end 11-Mar-2019) The Fraternity Memorial Hospital</p> |
| <p><b>Chair: Akihiko Yura</b><br/>(Keitaro Hashimoto end 19 Jul 2018)</p> <p>Nihonbashi Sakura Clinic Institutional Review Board<br/>5F Inamura building, Kayabacho Nihonbashi 1-9-2, Chuo-ku, Tokyo</p> | <p><b>Dr. F. Shirasaki</b></p> <p>Shirasaki Dermatology Clinic</p>                                                                   |

|                                                                                                                                                                                                                                                         |                                                                                                                                        |
|---------------------------------------------------------------------------------------------------------------------------------------------------------------------------------------------------------------------------------------------------------|----------------------------------------------------------------------------------------------------------------------------------------|
| <p><b>Chair: Kiyoshi Doi</b><br/> <b>(Hiroyuki Morita end 31 Mar 2019)</b></p> <p>Institutional Review Board of Pharmaceutical Product<br/> Consignment Research<br/> Gifu University Hospital<br/> 1-1 Yanagito, Gifu-shi, Gifu</p>                    | <p><b>Dr. M. Seishima</b><br/> Gifu University Hospital</p>                                                                            |
| <p><b>Chair: Toshihiro Yamanaka</b></p> <p>Ichinomiya Municipal Hospital Institutional Review Board<br/> 2-2-22 Bunkyo, Ichinomiya-shi, Aichi</p>                                                                                                       | <p><b>Dr. T. Mitsuma</b><br/> Ichinomiya Municipal Hospital</p>                                                                        |
| <p><b>Chair: Mikito Tsuyuki</b></p> <p>Japan Community Health Care Organization Chukyo<br/> Hospital Institutional Review Board 1-1-10 Sanjyo,<br/> Minami-ku, Nagoya-shi</p>                                                                           | <p><b>Dr. M. Kodera</b><br/> Japan Community Health care Organiza- tion Chukyo<br/> Hospital</p>                                       |
| <p><b>Chair: Koichi Takayama</b><br/> (Norito Katoh end 31 Mar 2019)</p> <p>Institutional Review Board of University Hos- pital, Kyoto<br/> Prefectural University of Medicine 465 Kajiicho,<br/> Kawaramachi-Hirokoji Kamigyo-ku, Kyoto-shi, Kyoto</p> | <p><b>Dr. N. Katoh</b><br/> University Hospital, Kyoto Prefectural University of<br/> Medicine</p> <p><b>ID# 2017-019</b></p>          |
| <p><b>Chair: Toshio Tanaka</b></p> <p>Local Independent Administrative Agency Act Osaka<br/> Prefectural Hospital Organization Osaka Habikino Medical<br/> Center Institutional<br/> Review Board,<br/> 3-7-1 Habikino, Habikino-shi, Osaka</p>         | <p><b>Dr. Y. Kataoka</b><br/> Osaka Habikono Medical Center</p>                                                                        |
| <p><b>Chair: Nobutaka Hatanaka</b></p> <p>Japan Community Health care Organization Osaka<br/> Hospital Institutional Review Board<br/> 4-2-78 Fukushima, Fukushima-ku, Osaka-shi</p>                                                                    | <p><b>Dr. Y. Takehara</b><br/> (Dr. R. Ikegami end 16- May-2018)<br/> Japan Community Health Care Organization<br/> Osaka Hospital</p> |
| <p><b>Chair: Hirohisa Tanimura</b></p> <p>Gokeikai Osaka Kaisei Hospital Institutional Review Board<br/> 1-6-10 Miyahara, Yodogawa-ku Osaka-<br/> shi, Osaka</p>                                                                                        | <p><b>Dr. A. Kato</b><br/> Gokeikai Osaka Kaisei Hospital</p>                                                                          |

|                                                                                                                                                                                            |                                                                  |
|--------------------------------------------------------------------------------------------------------------------------------------------------------------------------------------------|------------------------------------------------------------------|
| <p><b>Chair: Yukio Ohsaki</b><br/>(Fumihiko Kimura end 31 Mar 2019)</p> <p>Meiwa Hospital Institutional Review Board 4-31<br/>Agenaruo-cho, Nishinomiya-shi, Hyogo</p>                     | <p><b>Dr. I. Kurokawa</b><br/>Meiwa Hospital</p>                 |
| <p><b>Chair: Masaharu Ishihara</b><br/>(Takeshi Nakanishi end 19 Sep 2017)</p> <p>Hyogo College of Medicine Hospital Institutional Review Board<br/>1-1, Mukogawa-cho, Nishinomiya-shi</p> | <p><b>Dr. Y. Imai</b><br/>Hyogo College of Medicine Hospital</p> |
| <p><b>Chair: Koji Nagafuji</b></p> <p>Kurume University Hospital Institutional Review Board<br/>67 Asahimachi, Kurume-shi, Fukuoka</p>                                                     | <p><b>Dr. T. Nakama</b><br/>Kurume University Hospital</p>       |
| <p><b>Chair: Toshihiko Yanase</b><br/>(Shotaro Sakisaka end 31 Mar 2018)</p> <p>Fukuoka University Hospital Institutional Review Board<br/>7-45-1, Nanakuma, Jonan-ku, Fukuoka-shi</p>     | <p><b>Dr. S. Imafuku</b><br/>Fukuoka University Hospital</p>     |
| <p><b>Chair: Yasuo Takeda</b></p> <p>Kagoshima University Hospital Institutional Review Board<br/>8-35-1, Sakuragaoka, Kagoshima-shi, Kagoshima</p>                                        | <p><b>Dr. T. Kanekura</b><br/>Kagoshima University Hospital</p>  |
| <p><b>Chair: Kazuo Umemura</b></p> <p>Hamamatsu University Hospital Institutional Review Board<br/>1-20-1, Handayama, Higashi-ku,<br/>Hamamatsu-shi</p>                                    | <p><b>Dr. Y. Tokura</b><br/>Hamamatsu University hospital</p>    |
| <p><b>Chair: Hirohisa Tanimura</b></p> <p>Gokeikai Osaka Kaisei Hospital Institutional Review Board<br/>1-6-10 Miyahara, Yodogawa-ku Osaka-<br/>shi, Osaka</p>                             | <p><b>Dr. A. Kato</b><br/>Gokeikai Osaka Kaisei Hospital</p>     |

|                                                                                                                                                                                            |                                                                  |
|--------------------------------------------------------------------------------------------------------------------------------------------------------------------------------------------|------------------------------------------------------------------|
| <p><b>Chair: Yukio Ohsaki</b><br/>(Fumihiko Kimura end 31 Mar 2019)</p> <p>Meiwa Hospital Institutional Review Board 4-31<br/>Agenaruo-cho, Nishinomiya-shi, Hyogo</p>                     | <p><b>Dr. I. Kurokawa</b><br/>Meiwa Hospital</p>                 |
| <p><b>Chair: Masaharu Ishihara</b><br/>(Takeshi Nakanishi end 19 Sep 2017)</p> <p>Hyogo College of Medicine Hospital Institutional Review Board<br/>1-1, Mukogawa-cho, Nishinomiya-shi</p> | <p><b>Dr. Y. Imai</b><br/>Hyogo College of Medicine Hospital</p> |
| <p><b>Chair: Koji Nagafuji</b></p> <p>Kurume University Hospital Institutional Review Board<br/>67 Asahimachi, Kurume-shi, Fukuoka</p>                                                     | <p><b>Dr. T. Nakama</b><br/>Kurume University Hospital</p>       |
| <p><b>Chair: Toshihiko Yanase</b><br/>(Shotaro Sakisaka end 31 Mar 2018)</p> <p>Fukuoka University Hospital Institutional Review Board<br/>7-45-1, Nanakuma, Jonan-ku, Fukuoka-shi</p>     | <p><b>Dr. S. Imafuku</b><br/>Fukuoka University Hospital</p>     |
| <p><b>Chair: Yasuo Takeda</b></p> <p>Kagoshima University Hospital Institutional Review Board<br/>8-35-1, Sakuragaoka, Kagoshima-shi, Kagoshima</p>                                        | <p><b>Dr. T. Kanekura</b><br/>Kagoshima University Hospital</p>  |
| <p><b>Chair: Kazuo Umemura</b></p> <p>Hamamatsu University Hospital Institutional Review Board<br/>1-20-1, Handayama, Higashi-ku,<br/>Hamamatsu-shi</p>                                    | <p><b>Dr. Y. Tokura</b><br/>Hamamatsu University hospital</p>    |

## SPAIN

|                                                                                                                                                                                                                      |                                                                                   |
|----------------------------------------------------------------------------------------------------------------------------------------------------------------------------------------------------------------------|-----------------------------------------------------------------------------------|
| <p><b>IEC/IRB Committee</b><br/><b>Chair and Name of Committee</b><br/><b>Chair: Almudena Castro Conde</b><br/>CEIC Hospital La Paz<br/>Paseo de la Castellana, 261; Planta 8ª Hospital General<br/>28046 Madrid</p> | <p><b>Investigator / Site</b></p> <p><b>Dr. P Herranz</b><br/>Hospital la Paz</p> |
|----------------------------------------------------------------------------------------------------------------------------------------------------------------------------------------------------------------------|-----------------------------------------------------------------------------------|

|  |                                                                                  |
|--|----------------------------------------------------------------------------------|
|  | <b>Dr. P.de. la Cueva Dobao</b><br>Hospital Infanta Leonor                       |
|  | <b>Dr. J. Sánchez Pérez</b><br>Hospital Uni. de La Princesa                      |
|  | <b>Dr. A. Garrido</b><br>Dr. J. Borbujo, end 13-Jul-2018 Hospital de Fuenlabrada |
|  | <b>Dr. A. Espana</b><br>Clinica de Navarra                                       |
|  | <b>Dr. M. Rodriguez Sema</b><br>Hospital de la Fe                                |
|  | <b>Dr. C. Ferrandiz</b><br>Hospital Germans Trias i Pujol                        |
|  | <b>Dr. R. Pujol</b><br>Hospital del Mar                                          |
|  | <b>Dr. S. Puig Sarda</b><br>Hospital Clinic de Barcelona                         |
|  | <b>Dr. L. Puig</b><br>Hospital Sant Pau                                          |
|  | <b>Dr. R. M. Izu</b><br>Hospital Basurto                                         |
|  | <b>Dr. J. Gardeazabal</b><br>Hospital Cruces                                     |
|  | <b>Dr. A. Fernández Orland</b><br>Hospital Virgen de La Macarena                 |
|  | <b>Dr. J. Ruano</b><br>Hospital Reina Sofia                                      |

**USA**

|                                                                                                                                                                                    |                                                          |
|------------------------------------------------------------------------------------------------------------------------------------------------------------------------------------|----------------------------------------------------------|
| <b>IEC/IRB Committee</b><br><b>Chair and Name of Committee:</b><br><b>Chair: Sara Harnish, J.D.</b><br>Advarra<br>6940 Columbia Gateway Drive, Suite 110 Columbia, MD<br>21046 USA | <b>Investigator / Site</b>                               |
|                                                                                                                                                                                    | <b>Dr. W Abramovits</b><br>Dermatology Treat & Research  |
|                                                                                                                                                                                    | <b>Dr. K. R. Beer</b><br>Kenneth R. Beer                 |
|                                                                                                                                                                                    | <b>Dr. A. Blauvelt</b><br>Oregon Medical Research Center |

|                                                           |                                                          |
|-----------------------------------------------------------|----------------------------------------------------------|
|                                                           | <b>ID# 201701962</b>                                     |
|                                                           | <b>Dr. T Bridges</b><br>Georgia Pollens                  |
|                                                           | <b>Dr. M Bukhalo</b><br>Arlington Dermatology            |
|                                                           | <b>Dr. D Carrasco</b><br>Austin Dermatology Associates   |
|                                                           | <b>Dr. R Chrzanowski</b><br>Allergy Center at Brookstone |
|                                                           | <b>Dr. D. Cohen</b><br>Derm Surgery Specialist           |
|                                                           | <b>Dr. J del Rosso</b><br>JDR Dermatology Research       |
|                                                           | <b>Dr. L. K. Ferris</b><br>UPMC                          |
|                                                           | <b>Dr. R. Granstein</b><br>Weil Cornell                  |
|                                                           | <b>Dr. R. Gharib</b><br>West Virginia Research           |
|                                                           | <b>Dr. C. Howington</b><br>Meridian Clinical Research    |
|                                                           | <b>Dr. B.E. Katz</b><br>Juva Research Center             |
|                                                           | <b>Dr. B. Kuttner</b><br>ACRC-Dermatology                |
|                                                           | <b>Dr. W. McFalda</b><br>Clarkston Dermatology           |
|                                                           | <b>Dr. W. K. Nahm</b><br>University Clinical Trials Inc  |
| <b>Dr. T. Nguyen</b><br>Tien Q. Nguyen                    |                                                          |
| <b>Dr. M. Olivier</b><br>Clinical Trials of SWLA          |                                                          |
| <b>Dr. L. Osman</b><br>Quest Dermatology Research         |                                                          |
| <b>Dr. D.M. Pariser</b><br>Virginia Clinical Research, In |                                                          |
| <b>Dr. C. Lucas-Anthony</b><br>Skin Care Research, Inc.   |                                                          |

ECZTRA 1&2 Clinically Meaningful Responses

|                                                                                                                                                                                                                                                                     |                                                                |
|---------------------------------------------------------------------------------------------------------------------------------------------------------------------------------------------------------------------------------------------------------------------|----------------------------------------------------------------|
|                                                                                                                                                                                                                                                                     | <p><b>Dr. G. Schmieder</b><br/>Park Avenue Dermatology</p>     |
|                                                                                                                                                                                                                                                                     | <p><b>Dr. L. Kircik</b><br/>Derm Research</p>                  |
|                                                                                                                                                                                                                                                                     | <p><b>Dr. H. Sofen</b><br/>Derm Research Associates</p>        |
|                                                                                                                                                                                                                                                                     | <p><b>Dr. W. Soong</b><br/>Clinical Research Center</p>        |
|                                                                                                                                                                                                                                                                     | <p><b>Dr. M. Stone</b><br/>Medisearch</p>                      |
|                                                                                                                                                                                                                                                                     | <p><b>Dr. E. Tanghetti</b><br/>Center for Dermatology</p>      |
|                                                                                                                                                                                                                                                                     | <p><b>Dr. P. C. Lee</b><br/>Center for Clinical Studies</p>    |
|                                                                                                                                                                                                                                                                     | <p><b>Dr. D. S. Wong</b><br/>Dermatology Specialists, Inc.</p> |
|                                                                                                                                                                                                                                                                     | <p><b>Dr. M. Zirwas</b><br/>Derma of Greater Columbus</p>      |
|                                                                                                                                                                                                                                                                     | <p><b>Dr. B. Lockshin</b><br/>DermAssociates</p>               |
|                                                                                                                                                                                                                                                                     | <p><b>Dr. P. Jenkin</b><br/>Derma Associates of Seattle</p>    |
|                                                                                                                                                                                                                                                                     | <p><b>Dr. S. T. Tying</b><br/>Derma Associates of Seattle</p>  |
|                                                                                                                                                                                                                                                                     | <p><b>Dr. G. Murakawa</b><br/>Derm Center</p>                  |
| <p><b>Lydia Furman, MD</b>, IRB Co-Chair (Biomedical)<br/> <b>Joseph Gibbons, MD</b>, IRB Co-Chair (Biomedical)<br/>         University Hospitals of Cleveland IRB Lakeside<br/>         1400<br/>         11100 Euclid Avenue<br/>         Cleveland, OH 44106</p> | <p><b>Dr. N. Korman</b><br/>University Hospitals Cleveland</p> |



|                                                                                                                                                                                                             |                                                                       |
|-------------------------------------------------------------------------------------------------------------------------------------------------------------------------------------------------------------|-----------------------------------------------------------------------|
| <p><b>Co-Chairs: Michael Cimino, MS, RPh and John Ryan, MD</b><br/>                 University at Buffalo IRB<br/>                 875 Ellicott Street, Room 5018<br/>                 Buffalo NY 14203</p> | <p><b>Dr. A. Sinha</b><br/>                 University at Buffalo</p> |
|-------------------------------------------------------------------------------------------------------------------------------------------------------------------------------------------------------------|-----------------------------------------------------------------------|

**ECZTRA 2**

**AUSTRALIA**

| IEC/IRB Committee<br>Chair and Name of Committee                                                                                                                                                                  | Investigator / Site                                                                     |
|-------------------------------------------------------------------------------------------------------------------------------------------------------------------------------------------------------------------|-----------------------------------------------------------------------------------------|
| <p><b>Chair: Barry Chatterton</b><br/>                 (Chair, Committee D) Bellberry Limited<br/>                 123 Glen Osmond Road<br/>                 Eastwood, SA 5063<br/>                 Australia</p> | <p><b>Dr. L. Spelman</b><br/>                 Veracity Clinical Research</p>            |
|                                                                                                                                                                                                                   | <p><b>Dr. S. Shumack</b><br/>                 St. George Dermatology</p>                |
|                                                                                                                                                                                                                   | <p><b>Dr. J. Kuchel</b><br/>                 Skin &amp; Cancer Foundation Australia</p> |
|                                                                                                                                                                                                                   | <p><b>Dr. D. Rubel</b><br/>                 Woden Dermatology</p>                       |
|                                                                                                                                                                                                                   | <p><b>Dr. P. Foley</b><br/>                 Skin and Cancer Foundation Inc.</p>         |
|                                                                                                                                                                                                                   | <p><b>Dr. R. Sinclair</b><br/>                 Sinclair Dermatology</p>                 |
|                                                                                                                                                                                                                   | <p><b>Dr. E. Tan</b><br/>                 Burswood Dermatology</p>                      |

**CANADA**

| IEC/IRB Committee<br>Chair and Name of Committee                                                                                                                                               | Investigator / Site                                                              |
|------------------------------------------------------------------------------------------------------------------------------------------------------------------------------------------------|----------------------------------------------------------------------------------|
| <p><b>Chair: Neil Malhotra</b><br/>                 Research Review Board Inc.<br/>                 19-13085 Yonge Street, Suite 203, Richmond Hill,<br/>                 Ontario, L4E 0K2</p> | <p><b>Dr. L. Guenther</b><br/>                 Guenther Derm Research Centre</p> |
|                                                                                                                                                                                                | <p><b>Dr. C. Hong</b><br/>                 Dr. Chih-ho Hong Medical</p>          |
|                                                                                                                                                                                                | <p><b>Dr. C. Lynde</b><br/>                 Lynderm Research Inc.</p>            |
|                                                                                                                                                                                                | <p><b>Dr. J. K. Rivers</b><br/>                 Pacific Derm</p>                 |
|                                                                                                                                                                                                | <p><b>Dr. I. Turchin</b><br/>                 Brunswick Dermatology Centre</p>   |
|                                                                                                                                                                                                | <p><b>Dr. L. Albrecht</b><br/>                 Enverus Medical Research</p>      |
|                                                                                                                                                                                                | <p><b>Dr. J. Keddy-Grant</b><br/>                 Winnipeg Clinic</p>            |
|                                                                                                                                                                                                | <p><b>Dr. M. Gooderham</b><br/>                 Skin Centre for Dermatology</p>  |

|                                                                                                                                                                                                             |                                                            |
|-------------------------------------------------------------------------------------------------------------------------------------------------------------------------------------------------------------|------------------------------------------------------------|
|                                                                                                                                                                                                             | <b>Dr. K. Papp</b><br>K. Papp Clinical Research Inc.       |
|                                                                                                                                                                                                             | <b>Dr. D. Toth</b><br>XLR8 Medical Research                |
|                                                                                                                                                                                                             | <b>Dr. D. Gratton</b><br>Dr. David Gratton Dermatologue    |
|                                                                                                                                                                                                             | <b>Dr. Y. Poulin</b><br>CRDQ                               |
|                                                                                                                                                                                                             | <b>Dr. M. Raman</b><br>Dermatology & Cosmetic Surgery      |
|                                                                                                                                                                                                             | <b>Dr. L. Rosoph</b><br>North Bay Dermatology Centre       |
|                                                                                                                                                                                                             | <b>Dr. M. Robern</b><br>Dermatology Ottawa Research Centre |
|                                                                                                                                                                                                             | <b>Dr. E. Poulos</b><br>Kingsway Clinical Research         |
|                                                                                                                                                                                                             | <b>Dr. M. Lomaga</b><br>DermEdge Research                  |
| <b>Chair: Dr. Lindsay Nicolle</b><br>Biomedical Research Ethics Board<br>University of Manitoba,<br>P126-770 Bannatyne Avenue, Winnipe<br>Manitoba, R3E 0W3                                                 | <b>Dr. M. Wiseman</b><br>Wiseman Dermatology Research      |
| <b>Chair: Dr. Chris MacKnight, Executive Chair</b><br>Nova Scotia Health Authority Research Ethics Board,<br>Centre for Clinical Research, Rm 118, 5790 University<br>Avenue, Halifax, Nova Scotia, B3H 1V7 | <b>Dr. R. Langley</b><br>Eastern Canada Cutaneous Research |

**DENMARK**

|                                                                                                                                                                          |                                                      |
|--------------------------------------------------------------------------------------------------------------------------------------------------------------------------|------------------------------------------------------|
| <b>IEC/IRB Committee</b><br><b>Chair and Name of Committee</b>                                                                                                           | <b>Investigator / Site</b>                           |
| <b>Chair: Vibeke Brix Christensen</b><br><b>(Committee A)</b><br>De Videnskabsetiske Komiteer for Region Hovedstaden<br>Regionsgården , Kongens Vænge 2<br>3400 Hillerød | <b>Dr. L.Skov</b><br>Gentofte Hospital               |
|                                                                                                                                                                          | <b>Dr. M. Deleuran</b><br>Aarhus University Hospital |
|                                                                                                                                                                          | <b>Dr. T. Agner</b><br>Bispebjerg Hospital           |

**ITALY**

|                                                                |                                                       |
|----------------------------------------------------------------|-------------------------------------------------------|
| <b>IEC/IRB Committee</b><br><b>Chair and Name of Committee</b> | <b>Investigator / Site</b>                            |
| <b>Chair: Gigliola Sica</b>                                    | <b>Prof. K. Peris</b><br>Policlinico Agostino Gemelli |

|                                                                                                                                                     |                                                                |
|-----------------------------------------------------------------------------------------------------------------------------------------------------|----------------------------------------------------------------|
| Comitato Etico della Fondazione Policlinico Universitario Agostino Gemelli IRCCS Universita' Cattolica Del Sacro Cuore - Largo Gemelli - 00168 Roma |                                                                |
| <b>Chair: Gianlorenzo Piccioli</b><br>Comitato Etico per le Province di L'Aquila e Teramo - Via Vetoio -<br>67100 Coppito (L'Aquila)                | <b>Prof. M. Fagnoli</b><br>Ospedale San Salvatore              |
| <b>Chair: Agostino Migone De Amicis</b><br>Comitato Etico Indipendente Istituto Clinico Humanitas -<br>Via A. Manzoni, 56 - 20089 Rozzano (Milano)  | <b>Prof. A. Costanzo</b><br>Istituto Clinico Humanitas         |
| <b>Chair: Nicola Latronico</b><br>Comitato Etico Provinciale della Provincia di Brescia -<br>Piazza Spedali Civili, 1 - 25123 Brescia               | <b>Dr. M. Rossi</b><br>Spedali Civili Brescia                  |
| <b>Chair: Filippo Drago</b><br>Comitato Etico Catania 1 AOU Policlinico Vittorio Emanuele - Via Santa Sofia 78 - 95123 Catania                      | <b>Prof. G. Micali</b><br>A.O.U. Policlinico Vittorio Emanuele |
| <b>Chair: Francesco D'Agostino</b><br>Comitato Etico Centrale IRCCS Lazio Sezione IFO-<br>BIETTI - Via Elio Chianesi, 53 - 00144 Roma               | <b>Dr. A. Cristaudo</b><br>IRCCS Istituti Fisioterapici        |
| <b>Chair: Romano Danesi</b><br>Comitato Etico Regione Toscana - Area Vasta Nord Ovest - Via Roma, 67 - 56126 Pisa                                   | <b>Prof. M. Romanelli</b><br>AOU Pisa                          |

**SOUTH KOREA**

| <b>IEC/IRB Committee<br/>Chair and Name of Committee</b>                                                                                                                       | <b>Investigator / Site</b>                                            |
|--------------------------------------------------------------------------------------------------------------------------------------------------------------------------------|-----------------------------------------------------------------------|
| <b>Chair: JinYong Jeong, MD, PhD</b><br>The Catholic University of Korea, Incheon St. Mary's Hospital Institutional Review Board<br>56, Dongsu-ro, Bupyeong-gu, Incheon, 21431 | <b>Dr. S. Cho</b><br>St. Mary's Hospital                              |
| <b>Chair: Yang Ik</b><br>Kangnam Sacred Heart Hospital Institutional Review Board<br>1, Singil-ro, Yeongdeungpo-gu, Seoul, 07441                                               | <b>Dr. C. Park</b><br>Hallym University Kangnam Sacred Heart Hospital |
| <b>Chair: Seong Kyu Park</b><br>Soon Chun Hyang University Hospital Bucheon Institutional Review Board<br>170, Jomaru-ro, Wonmi-gu, Busheon-si, Gyeonggi-do, 14584             | <b>Dr. Y. Park</b><br>Soon Chun Hyang University Hospital             |
| <b>Chair: Byung Joo Park</b><br>Seoul National University Hospital Institutional Review Board<br>101, Daehak-ro, Jongno-gu, Seoul, 03080                                       | <b>Dr. K. Kim</b><br>Seoul National University Hospital               |

|                                                                                                                                                                  |                                                                    |
|------------------------------------------------------------------------------------------------------------------------------------------------------------------|--------------------------------------------------------------------|
| <p><b>Chair: Byung Mann Cho</b><br/>Pusan National University Hospital Institutional Review Board<br/>187, Gudeok-Ro, Seo-Gu, Busan, 49241</p>                   | <p><b>Dr. M. Kim</b><br/>Pusan National University Hospital</p>    |
| <p><b>Chair: Sang Heon Lee</b><br/>Konkuk University Medical Center<br/>Institutional Review Board<br/>120-1, Neungdong-ro, Gwangjin-gu, Seoul, 05030</p>        | <p><b>Dr. Y. Lee</b><br/>Konkuk University Medical Center</p>      |
| <p><b>Chair: Jae Hee Cheon</b><br/>Severance Hospital, Institutional Review Board<br/>50-1, Yonsei-ro, Seodamun-gu, Seoul, 03722</p>                             | <p><b>Dr. C. Park</b><br/>Yonsei University Health System</p>      |
| <p><b>Chair: Jun Won Um</b><br/>Korea University Ansan Hospital<br/>Institutional Review Board<br/>123, Jeokgeum-ro, Danwon-gu, Ansan-si, Gyeonggi-do, 15355</p> | <p><b>Dr. S. Son</b><br/>Korea University Ansan Hospital</p>       |
| <p><b>Chair: Jeong Kyu Lee</b><br/>Chung-Ang University Hospital<br/>Institutional Review Board<br/>102, Heukseok-ro, Dongjak-gu, Seoul, 06973</p>               | <p><b>Dr. S. Seo</b><br/>Chung-Ang University Hospital</p>         |
| <p><b>Chair: Young Ho Won</b><br/>Chonnam National University Hospital<br/>Institutional Review Board<br/>42, Jebong-ro, Dong-gu, Gwangju, 61469</p>             | <p><b>Dr. S. Lee</b><br/>Chonnam National University Hospital</p>  |
| <p><b>Chair: Gwang Seong Choi</b><br/>Inha University Hospital Institutional Review Board<br/>27, Inhang-ro, Jung-gu, Incheon, 22332</p>                         | <p><b>Dr. G. Choi</b><br/>Inha University Hospital</p>             |
| <p><b>Chair: Kwnag Sun Suh</b><br/>Chungnam National University Hospital<br/>Institutional Review Board<br/>282, Munhwa-ro, Jung-gu, Daejeon, 35015</p>          | <p><b>Dr. Y. Seo</b><br/>Chungnam National University Hospital</p> |

**POLAND**

|                                                                        |                                   |
|------------------------------------------------------------------------|-----------------------------------|
| <p><b>IEC/IRB Committee</b><br/><b>Chair and Name of Committee</b></p> | <p><b>Investigator / Site</b></p> |
|------------------------------------------------------------------------|-----------------------------------|

|                                                                                                                                                 |                                                                   |
|-------------------------------------------------------------------------------------------------------------------------------------------------|-------------------------------------------------------------------|
| <p><b>Chair: Eugeniusz Małafiej</b><br/>Komisja Bioetyczna przy Okręgowej Izbie Lekarskiej w Łodzi</p> <p>ul. Czerwona 3</p> <p>93-005 Lodz</p> | <p><b>Dr. D. Wielowieyska</b><br/>Krakowskie Centrum Medyczne</p> |
|                                                                                                                                                 | <p><b>Dr. S. Vanaga-Besser</b><br/>Pratia MCM Kraków</p>          |
|                                                                                                                                                 | <p><b>Dr. D. Kolodziejczyk</b><br/>Pratia MCM Kraków</p>          |
|                                                                                                                                                 | <p><b>Prof. A. Reich</b><br/>Klinika Dermatologii</p>             |
|                                                                                                                                                 | <p><b>Prof. A. Kaszuba</b><br/>DERMED" Centrum Medyczne Sp.</p>   |
|                                                                                                                                                 | <p><b>Prof. A. Lesiak</b><br/>Dermoklinika Centrum Medyczne</p>   |
|                                                                                                                                                 | <p><b>Dr. A. Szarmach</b><br/>Centrum Medyczne Gdynia</p>         |
|                                                                                                                                                 | <p><b>Dr. R. Slugocki</b><br/>Synexus Polska Gdyni</p>            |
|                                                                                                                                                 | <p><b>Dr. M. Pawlaczyk</b><br/>Synexus Polska Poznaniu</p>        |

**RUSSIA**

| IEC/IRB Committee<br>Chair and Name of Committee                                                                                                                                                                                                                                                    | Investigator / Site                                                 |
|-----------------------------------------------------------------------------------------------------------------------------------------------------------------------------------------------------------------------------------------------------------------------------------------------------|---------------------------------------------------------------------|
| <p><b>Chair: Alexander Viktorovich Chestkov</b><br/>The local IRB at the Federal State Budgetary Institution "State Scientific Center of Dermatovenerology and Cosmetology" of Ministry of Healthcare of the Russian Federation<br/>3, bldg.6, ul. Korolenko<br/>Moscow- 107076</p>                 | <p><b>Dr. A. Karamova</b><br/>Federal State Budgetary Institute</p> |
| <p><b>Chair: Sergey Borisovich Shustov</b><br/>The local IRB at the Federal State Budgetary Military School of Higher Education "Military Medical Academy n.a. S.M.Kirov" of Ministry of Defense of the Russian Federation<br/>6, lit. ZH, ul. Akademika Lebedeva<br/>Saint-Petersburg - 194044</p> | <p><b>Prof. A. Samtsov</b><br/>Military Medical Academy</p>         |
| <p><b>Chair: Alexey Vladimirovich Sobolev</b><br/>The local IRB at the Limited Liability Company Pierre Wolkenstein French Clinic of Skin Diseases<br/>24, lit.A, pom.1N, ul. Ryleeva<br/>Saint-Petersburg - 191123</p>                                                                             | <p><b>Prof. D. Zaslavsky</b><br/>French Clinic of Skin Diseases</p> |
| <p><b>Chair: Marina Anatolyevna Zakharova</b><br/>The local IRB at the State Budgetary Healthcare Institution "Chelyabinsk Regional Clinical Dermatovenerologic Dispensary" (SBHI ChRCDD)<br/>24, ul. Yablochkina<br/>Chelyabinsk - 454048</p>                                                      | <p><b>Dr. O. Ziganshin</b><br/>Chelyabinsk Dermat. Dispensary</p>   |

**UNITED KINGDOM**

| IEC/IRB Committee | Investigator / Site |
|-------------------|---------------------|
|-------------------|---------------------|

| <b>Chair and Name of Committee</b>                                                                                                                               |                                                                          |
|------------------------------------------------------------------------------------------------------------------------------------------------------------------|--------------------------------------------------------------------------|
| <b>Chair: Reverend Nigel Griffin</b><br>London-Fulham Research Ethics Committee<br>Barlow House<br>3 <sup>rd</sup> Floor, 4 Minshull Street<br>Manchester M1 3DZ | <b>Prof. M. Cork</b><br>Royal Hallamshire Hospital<br><br>ID# 17/LO/1147 |
|                                                                                                                                                                  | <b>Dr. A. Pink</b><br>Guy's Hospital                                     |
|                                                                                                                                                                  | <b>Dr. A. Bewley</b><br>Whipps Cross University Hospital                 |
|                                                                                                                                                                  | <b>Dr. S. Cliff</b><br>East Surrey Hospital                              |
|                                                                                                                                                                  | <b>Dr. B. Esdaile</b><br>The Whittington Hospital NHS                    |
|                                                                                                                                                                  | <b>Dr. J. Foester</b><br>Ninewells Hospital                              |
|                                                                                                                                                                  | <b>Dr. P. Laws</b><br>Chapel Allerton Hospital                           |
|                                                                                                                                                                  | <b>Dr. S. Meggitt</b><br>Royal Victoria Infirmary                        |
|                                                                                                                                                                  | <b>Dr. A. M. Layton</b><br>Harrogate District Hospital                   |
|                                                                                                                                                                  | <b>Dr. E. Ladoyanni</b><br>Russells Hall Hospital                        |
|                                                                                                                                                                  | <b>Dr. Ranasinghe</b><br>West Suffolk Hospital                           |
|                                                                                                                                                                  | <b>Dr. J. Halpern</b><br>Walsall Healthcare NHS Trust                    |
|                                                                                                                                                                  | <b>Prof. R. Warren</b><br>Salford Royal Hospital                         |

**USA**

| <b>IEC/IRB Committee</b>                                                                                                                                  | <b>Investigator / Site</b>                             |
|-----------------------------------------------------------------------------------------------------------------------------------------------------------|--------------------------------------------------------|
| <b>Chair and Name of Committee</b><br><br><b>Chair: Sara Harnish, J.D.</b><br>Advarra<br>6940 Columbia Gateway Drive, Suite 110<br>Columbia, MD 21046 USA |                                                        |
|                                                                                                                                                           | <b>Dr. M. Zook</b><br>Olympian Clinical Research       |
|                                                                                                                                                           | <b>Dr. M. Ling</b><br>MedaPhase                        |
|                                                                                                                                                           | <b>Dr. J. Bagel</b><br>NJ Psoriasis Treatment Center   |
|                                                                                                                                                           | <b>Dr. N. Bhatia</b><br>Therapeutics Clinical Research |
|                                                                                                                                                           | <b>Dr. J. Cather</b><br>Modern Research Associates     |
|                                                                                                                                                           | <b>Dr. K. Dawes</b><br>Dawes Fretzin Clin Research     |
|                                                                                                                                                           | <b>Dr. J. DeMaria</b><br>Aventiv Research Inc.         |

ECZTRA 1&2 Clinically Meaningful Responses

|  |                                                                                                                  |
|--|------------------------------------------------------------------------------------------------------------------|
|  | <b>Dr. R. Fried</b><br>Yardley Dermatology Associates                                                            |
|  | <b>Dr. E. Guttman</b><br>Mount Sinai School of Medicine                                                          |
|  | <b>Dr. M. Heffernan</b><br>San Luis Dermatology                                                                  |
|  | <b>Dr. G. Jimenez</b><br>Spotlight Research Center                                                               |
|  | <b>Dr. V. Kuochung</b><br>Beacon                                                                                 |
|  | <b>Dr. E. Lain</b><br>Pflugerville Dermatology                                                                   |
|  | <b>Dr. M. Lee</b><br>Progressive Clin Research                                                                   |
|  | <b>Dr. J. Leflein</b><br>Respiratory Medi Research                                                               |
|  | <b>Dr. K. Loven</b><br>Rivergate Derm                                                                            |
|  | <b>Dr. M. McCune</b><br>Kansas City Dermatology                                                                  |
|  | <b>Dr. N. Nami</b><br>Island Dermatology                                                                         |
|  | <b>Dr. L. Parish</b><br>Paddington Testing Company Inc                                                           |
|  | <b>Dr. P. Rich</b><br>Oregon Dermatology & Research                                                              |
|  | <b>Dr. N. Sadick</b><br>Sadick Derm                                                                              |
|  | <b>Dr. J. Soung</b><br>Southern California Dermatology                                                           |
|  | <b>Dr. K. Aguirre</b><br>(Dr. A. Nguyen, end 13-Sep-2018)<br>(Dr. D. Sire, end 02-Mar-2018)<br>Advanced Skincare |
|  | <b>Dr. C. Smith</b><br>Corning Center                                                                            |
|  | <b>Dr. D. Stough</b><br>Burke Pharm Research                                                                     |
|  | <b>Dr. T. Sullivan</b><br>Dr. Tory P. Sullivan                                                                   |
|  | <b>Dr. J. Travers</b><br>Wright State Physicians                                                                 |
|  | <b>Dr. J. Woodson</b><br>Clinical Studies Group                                                                  |
|  | <b>Dr. T. E. Schlesinger</b><br>Dermatology and Laser Center                                                     |
|  | <b>Dr. C. Teller</b><br>Bellaire Dermatology                                                                     |
|  | <b>Dr. S. Smith</b>                                                                                              |

|                                                                                                                                                                                                             |                                                                                                                                     |
|-------------------------------------------------------------------------------------------------------------------------------------------------------------------------------------------------------------|-------------------------------------------------------------------------------------------------------------------------------------|
|                                                                                                                                                                                                             | <p>California Dermatology</p> <p><b>Dr. J. Thiele</b><br/>(Dr. C. Goldsmith, end 20-Sep-2017)<br/>Dermatology Specialists, Inc.</p> |
| <p><b>Chair- Michael Bowdish, MD</b></p> <p>University of Southern California Institutional Review Board</p> <p>1640 Marengo St., Suite 700<br/>Los Angeles, CA 90033</p> <p>Chair- Michael Bowdish, MD</p> | <p><b>Dr. A. Armstrong</b><br/>University of Southern CA</p>                                                                        |
| <p><b>Chair- Christina Marciniak</b></p> <p>Northwestern U IRB #1- Panel A<br/>750 N. Lake Shore Dr<br/>Rubloff Building, 7<sup>th</sup> Floor<br/>Chicago, IL 60611</p>                                    | <p><b>Dr. J. Silverberg</b><br/>Northwestern Memorial Hospital</p> <p>ID# STU00205339</p>                                           |
| <p><b>Chair- Timothy A Roehrs, PHD</b></p> <p>Henry Ford Health System IRB</p> <p>One Ford Place, 2F<br/>Detroit, MI 48202</p>                                                                              | <p><b>Dr. L. Stein-Gold</b><br/>Henry Ford Medical Centre</p>                                                                       |



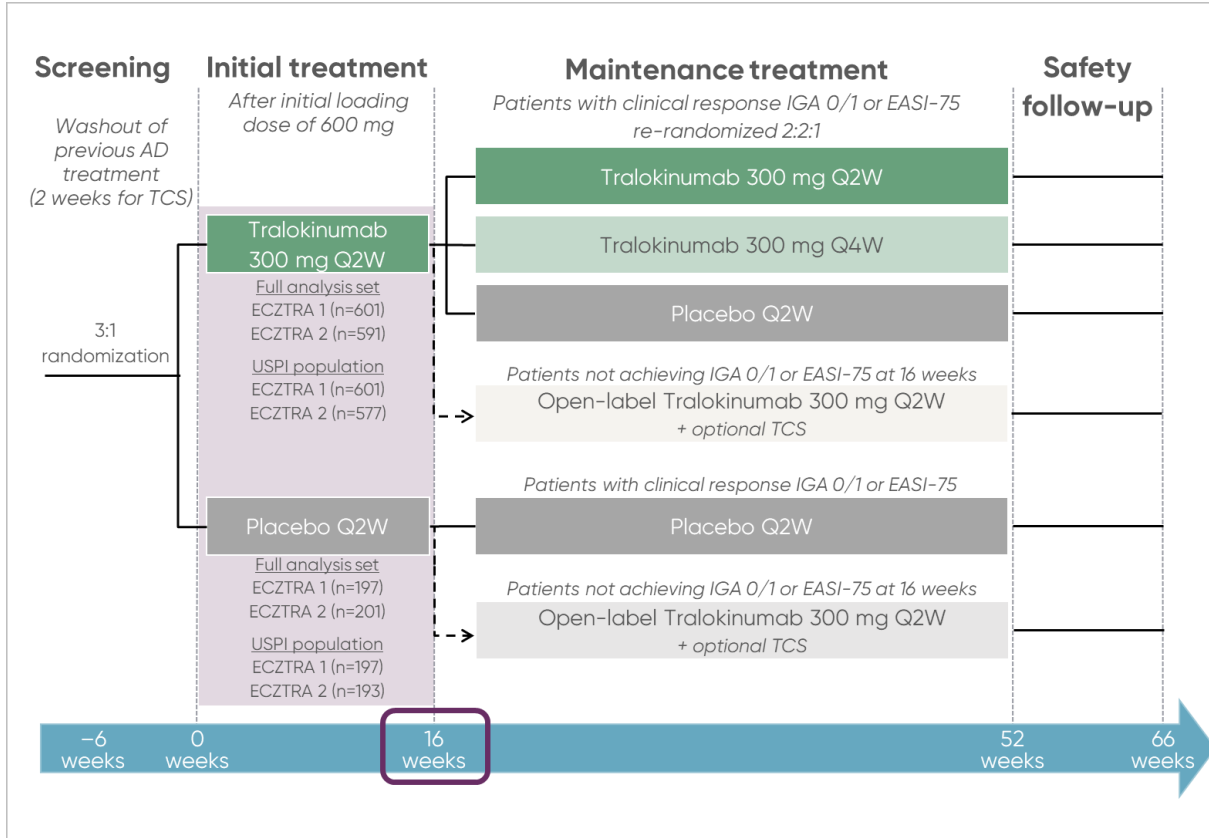

**Fig. S1** ECZTRA 1 and 2 trial design. AD: atopic dermatitis. EASI: Eczema Area Severity Index. EASI-75: at least 75% improvement in EASI. IGA: Investigator’s Global Assessment. Q2W: once every 2 weeks. Q4W: once every 4 weeks. TCS: topical corticosteroids.

**Table S1** Baseline characteristics for ECZTRA 1 and 2 non-responders at Week 16 split by achievement of at least one clinically meaningful response

|                                                   | Not Achieving at least one clinically meaningful response <sup>a</sup> at Week 16 |                   |                   |             | At least one clinically meaningful response <sup>a</sup> at Week 16 |             |                   |                   |
|---------------------------------------------------|-----------------------------------------------------------------------------------|-------------------|-------------------|-------------|---------------------------------------------------------------------|-------------|-------------------|-------------------|
|                                                   | NRI dataset                                                                       |                   | AO dataset        |             | NRI dataset                                                         |             | AO dataset        |                   |
|                                                   | Tralo (N=495)                                                                     | PBO (N=259)       | Tralo (N=160)     | PBO (N=115) | Tralo (N=471)                                                       | PBO (N=103) | Tralo (N=741)     | PBO (N=213)       |
| Mean age, y (SD)                                  | 38.6 (14.2)                                                                       | 36.0 (14.2)       | 37.7 (15.1)       | 34.0 (12.9) | 37.4 (14.4)                                                         | 40.9 (16.2) | 38.2 (14.1)       | 39.0 (14.9)       |
| Male, n (%)                                       | 306 (61.8)                                                                        | 159 (61.4)        | 112 (70.0)        | 66 (57.4)   | 281 (59.7)                                                          | 55 (53.4)   | 443 (59.8)        | 127 (59.6)        |
| Race, n (%)                                       |                                                                                   |                   |                   |             |                                                                     |             |                   |                   |
| White                                             | 312 (63.2)                                                                        | 166 (64.6)        | 107 (66.9)        | 71 (61.7)   | 317 (67.3)                                                          | 74 (72.5)   | 483 (65.3)        | 150 (71.4)        |
| Black or African American                         | 30 (6.1)                                                                          | 16 (6.2)          | 8 (5.0)           | 8 (7.0)     | 35 (7.4)                                                            | 6 (5.9)     | 44 (5.9)          | 8 (3.8)           |
| Asian American                                    | 136 (27.5)                                                                        | 68 (26.5)         | 42 (26.3)         | 33 (28.7)   | 102 (21.7)                                                          | 20 (19.6)   | 187 (25.3)        | 48 (22.9)         |
| Indian or Alaska Native                           | 1 (0.2)                                                                           | 0 (0.0)           | 1 (0.6)           | 0 (0.0)     | 2 (0.4)                                                             | 0 (0.0)     | 2 (0.3)           | 0 (0.0)           |
| Hawaiian or other Pacific Islander                | 4 (0.8)                                                                           | 0 (0.0)           | 0 (0.0)           | 0 (0.0)     | 1 (0.2)                                                             | 0 (0.0)     | 2 (0.3)           | 0 (0.0)           |
| Other                                             | 11 (2.2)                                                                          | 7 (2.7)           | 2 (1.3)           | 3 (2.6)     | 14 (3.0)                                                            | 2 (2.0)     | 22 (3.0)          | 4 (1.9)           |
| Missing data                                      | 1                                                                                 | 2                 | 0                 | 0           | 0                                                                   | 1           | 1                 | 3                 |
| Mean duration of AD, y (SD)                       | 28.5 (15.6)                                                                       | 28.7 (14.1)       | 24.5 (13.6)       | 27.6 (13.9) | 27.7 (14.8)                                                         | 30.0 (16.9) | 28.9 (15.5)       | 30.2 (15.0)       |
| Mean BSA involvement with AD, % (SD)              | 58.2 (25.3)                                                                       | 57.2 (25.5)       | 52.5 (25.0)       | 52.5 (22.8) | 52.4 (23.8)                                                         | 51.0 (23.7) | 56.2 (24.5)       | 57.6 (25.7)       |
| IGA, n (%)                                        |                                                                                   |                   |                   |             |                                                                     |             |                   |                   |
| IGA 3 (moderate)                                  | 204 (41.2)                                                                        | 115 (44.4)        | 81 (50.6)         | 62 (53.9)   | 240 (51.0)                                                          | 53 (51.5)   | 327 (44.1)        | 88 (41.3)         |
| IGA 4 (severe)                                    | 291 (58.8)                                                                        | 144 (55.6)        | 79 (49.4)         | 53 (46.1)   | 231 (49.0)                                                          | 50 (48.5)   | 414 (55.9)        | 125 (58.7)        |
| Mean EASI (SD)                                    | 34.6 (14.6)                                                                       | 34.3 (14.1)       | 32.0 (14.0)       | 32.2 (12.3) | 32.6 (14.1)                                                         | 31.8 (13.3) | 34.1 (14.4)       | 34.5 (14.5)       |
| Mean weekly average worst daily pruritus NRS (SD) | 8.0 (1.4), n=489                                                                  | 8.0 (1.3), n=257  | 7.8 (1.3), n=159  | 7.7 (1.4)   | 7.7 (1.5), n=469                                                    | 7.7 (1.3)   | 7.9 (1.5), n=737  | 8.0 (1.3), n=211  |
| Mean DLQI (SD)                                    | 17.8 (7.3), n=488                                                                 | 17.9 (7.0), n=256 | 15.6 (7.6), n=158 | 16.1 (6.9)  | 17.5 (6.9), n=468                                                   | 17.7 (6.3)  | 18.0 (6.9), n=735 | 18.7 (6.5), n=211 |

<sup>a</sup>EASI-50,  $\geq 3$ -point improvement in itch NRS, or  $\geq 4$ -point improvement in DLQI.

AO: as observed. AD: atopic dermatitis. BSA: body surface area. DLQI: Dermatology Life Quality Index. EASI: Eczema Area and Severity Index. EASI-50: at least 50% improvement in EASI. IGA: Investigator's Global Assessment. NRI: non-responder imputation. NRS: numeric rating scale. n: number of subjects in analysis set. PBO: placebo. Q2W: every 2 weeks. SD: standard deviation. Tralo: tralokinumab.

**Table S2** Week 16 outcomes for ECZTRA 1 and 2 non-responders at Week 16

|                                                             | NRI dataset          |                   | AO dataset <sup>a</sup> |                   |
|-------------------------------------------------------------|----------------------|-------------------|-------------------------|-------------------|
|                                                             | Tralo<br>(N=966)     | PBO<br>(N=362)    | Tralo<br>(N=901)        | PBO<br>(N=328)    |
| <b>EASI, n</b>                                              | 966                  | 362               | 899                     | 328               |
| Mean (SD)                                                   | 24.4 (16.7)          | 29.9 (15.7)       | 17.7 (13.7)             | 23.6 (14.8)       |
| Absolute change from baseline, Mean (SD)                    | -9.2 (12.5)          | -3.7 (10.2)       | -16.1 (13.4)            | -10.1 (14.5)      |
| <b>weekly average worst daily pruritus<br/>NRS, n</b>       | 958                  | 360               | 827                     | 301               |
| Mean (SD)                                                   | 6.5 (2.4)            | 7.3 (2.1)         | 5.4 (2.4)               | 6.1 (2.3)         |
| Absolute change from baseline, Mean (SD)                    | -1.4 (2.1)           | -0.6 (1.6)        | -2.5 (2.2)              | -1.8 (2.2)        |
| <b>eczema-related sleep interference<br/>(sleep) NRS, n</b> | 958                  | 360               | 827                     | 301               |
| Mean (SD)                                                   | 5.7 (2.8)            | 6.5 (2.5)         | 4.4 (2.7)               | 5.2 (2.7)         |
| Absolute change from baseline, Mean (SD)                    | -1.4 (2.2)           | -0.6 (1.7)        | -2.6 (2.5)              | -1.9 (2.5)        |
| <b>SCORAD, n</b>                                            | 966                  | 362               | 899                     | 327               |
| Mean (SD)                                                   | 57.6 (20.4)          | 65.9 (17.3)       | 47.8 (18.7)             | 56.2(18.4)        |
| Absolute change from baseline, Mean (SD)                    | -13.7 (17.1)         | -6.1 (13.8)       | -23.6 (17.3)            | -15.8 (19.1)      |
| <b>DLQI, n</b>                                              | 961                  | 359               | 873                     | 319               |
| Mean (SD)                                                   | 13.1 (8.5)           | 15.6 (8.1)        | 9.5 (7.2)               | 11.8 (7.8)        |
| Absolute change from baseline, Mean (SD)                    | -4.5 (6.7),<br>n=958 | -2.2 (5.3), n=360 | -8.1 (7.3),<br>n=866    | -6.0 (7.5), n=318 |

<sup>a</sup>Fewer patients compared to NRI dataset since patients with missing observations were omitted.

AO: as observed. DLQI: Dermatology Life Quality Index. EASI: Eczema Area and Severity Index. NRI: non-responder imputation. NRS: numeric rating scale. n: number of subjects in analysis set. PBO: placebo. SD: standard deviation. SCORAD: SCORing Atopic Dermatitis. Tralo: tralokinumab.

**Results from analyses based on the United States Prescribing Information (USPI)\* are provided here:**

\*Two sites in the ECZTRA 2 trial were closed due to GCP non-compliance issues. The US Food and Drug Administration (FDA) review team decided to exclude the data from these sites (22 patients) from the efficacy and safety analysis in the USPI.

**Table S3** Baseline characteristics for ECZTRA 1 and 2 responders (IGA 0/1 without rescue medication) versus non-responders at Week 16 (USPI population)

|                                                               | IGA >1 <sup>a</sup><br>at Week 16 |                      |                         |                      | IGA 0/1 <sup>b</sup><br>at Week 16 |                     |
|---------------------------------------------------------------|-----------------------------------|----------------------|-------------------------|----------------------|------------------------------------|---------------------|
|                                                               | NRI dataset                       |                      | AO dataset <sup>c</sup> |                      | NRI and AO datasets <sup>d</sup>   |                     |
|                                                               | Tralo<br>(N=960)                  | PBO<br>(N=358)       | Tralo<br>(N=898)        | PBO<br>(N=327)       | Tralo<br>(N=218)                   | PBO<br>(N=32)       |
| Mean age, y (SD)                                              | 38.0 (14.3)                       | 37.3 (14.9)          | 38.1 (14.3)             | 37.2 (14.4)          | 37.3 (14.1)                        | 34.7 (13.6)         |
| Male, n (%)                                                   | 584 (60.8)                        | 211 (58.9)           | 553 (61.6)              | 193 (59.0)           | 113 (51.8)                         | 19 (59.4)           |
| Race, n (%)                                                   |                                   |                      |                         |                      |                                    |                     |
| White                                                         | 628 (65.5)                        | 240 (67.6)           | 589 (65.7)              | 221 (68.2)           | 166 (76.5)                         | 20 (62.5)           |
| Black or<br>African American                                  | 60 (6.3)                          | 18 (5.1)             | 50 (5.6)                | 15 (4.6)             | 12 (5.5)                           | 8 (25.0)            |
| Asian                                                         | 238 (24.8)                        | 88 (24.8)            | 229 (25.5)              | 81 (25.0)            | 36 (16.6)                          | 4 (12.5)            |
| American<br>Indian or<br>Native                               | 3 (0.3)                           | 0 (0.0)              | 3 (0.3)                 | 0 (0.0)              | 0 (0.0)                            | 0 (0.0)             |
| Native<br>Hawaiian or<br>Islander                             | 5 (0.5)                           | 0 (0.0)              | 2 (0.2)                 | 0 (0.0)              | 1 (0.5)                            | 0 (0.0)             |
| Other                                                         | 25 (2.6)                          | 9 (2.5)              | 24 (2.7)                | 7 (2.2)              | 2 (0.9)                            | 0 (0.0)             |
| Missing data                                                  | 1                                 | 3                    | 1                       | 3                    | 1                                  | 0                   |
| Mean duration of AD,<br>y (SD)                                | 28.0 (15.2)                       | 29.1 (15.0)          | 28.1 (15.2)             | 29.3 (14.6)          | 27.7 (15.2)                        | 22.0 (14.4)         |
| Mean BSA<br>involvement with AD,<br>% (SD)                    | 55.5 (24.7)                       | 55.8 (25.0)          | 55.6 (24.6)             | 55.9 (24.8)          | 41.4 (21.4)                        | 37.9 (19.3)         |
| IGA, n (%)                                                    |                                   |                      |                         |                      |                                    |                     |
| IGA 3<br>(moderate)                                           | 440 (45.8)                        | 165 (46.1)           | 406 (45.2)              | 150 (45.9)           | 152 (69.7)                         | 23 (71.9)           |
| IGA 4<br>(severe)                                             | 520 (54.2)                        | 193 (53.9)           | 492 (54.8)              | 177 (54.1)           | 66 (30.3)                          | 9 (28.1)            |
| Mean EASI (SD)                                                | 33.7 (14.4)                       | 33.7 (13.9)          | 33.8 (14.4)             | 33.7 (13.8)          | 26.2 (10.2)                        | 24.6 (9.7)          |
| Mean weekly average<br>worst daily pruritus<br>NRS (SD)       | 7.9 (1.4),<br>n=952               | 7.9 (1.3),<br>n=356  | 7.9 (1.4),<br>n=893     | 7.9 (1.3),<br>n=325  | 7.5 (1.5),<br>n=217                | 7.0 (1.6),<br>n=31  |
| Mean SCORAD (SD)                                              | 71.3 (13.1)                       | 71.9 (12.3)          | 71.4 (13.1)             | 71.9 (12.1)          | 65.5 (12.7)                        | 62.2 (11.2)         |
| Mean DLQI (SD)                                                | 17.7 (7.1),<br>n=950              | 17.9 (6.7),<br>n=355 | 17.6 (7.1),<br>n=890    | 17.8 (6.7),<br>n=325 | 15.7 (6.9),<br>n=214               | 13.4 (8.2),<br>n=31 |
| Mean eczema-related<br>sleep interference<br>(sleep) NRS (SD) | 7.1 (2.0),<br>n=952               | 7.1 (2.0),<br>n=356  | 7.1 (2.1),<br>n=893     | 7.1 (2.0),<br>n=325  | 6.8 (2.0),<br>n=217                | 5.9 (2.3),<br>n=31  |

<sup>a</sup>Patients who did not achieve IGA 0/1 at Week 16 and/or used rescue medication.

<sup>b</sup>Without rescue medication.

<sup>c</sup>Fewer patients compared to NRI dataset since patients with missing observations were omitted.

<sup>d</sup>For the responder population, the AO and NRI datasets are identical.

AO: as observed. AD: atopic dermatitis. BSA: body surface area. DLQI: Dermatology Life Quality Index. EASI: Eczema Area and Severity Index. IGA: Investigator's Global Assessment. NRI: non-responder imputation. NRS: numeric rating scale. n: number of subjects in analysis set. PBO: placebo. Q2W: every 2 weeks. SCORAD: SCORing Atopic Dermatitis. SD: standard deviation. Tralo: tralokinumab. USPI: United States Prescribing Information.

**Table S4** Baseline characteristics for ECZTRA 1 and 2 non-responders at Week 16 split by achievement of at least one clinically meaningful response (USPI population)

|                                                   | Not Achieving at least one clinically meaningful response <sup>a</sup> at Week 16 |                   |                   |             | At least one clinically meaningful response <sup>a</sup> at Week 16 |             |                   |                   |
|---------------------------------------------------|-----------------------------------------------------------------------------------|-------------------|-------------------|-------------|---------------------------------------------------------------------|-------------|-------------------|-------------------|
|                                                   | NRI dataset                                                                       |                   | AO dataset        |             | NRI dataset                                                         |             | AO dataset        |                   |
|                                                   | Tralo (N=492)                                                                     | PBO (N=255)       | Tralo (N=160)     | PBO (N=114) | Tralo (N=468)                                                       | PBO (N=103) | Tralo (N=738)     | PBO (N=213)       |
| Mean age, y (SD)                                  | 38.6 (14.2)                                                                       | 35.9 (14.1)       | 37.7 (15.1)       | 33.8 (12.8) | 37.3 (14.3)                                                         | 40.9 (16.2) | 38.2 (14.1)       | 39.0 (14.9)       |
| Male, n (%)                                       | 305 (62.0)                                                                        | 156 (61.2)        | 112 (70.0)        | 66 (57.9)   | 279 (59.6)                                                          | 55 (53.4)   | 441 (59.8)        | 127 (59.6)        |
| Race, n (%)                                       |                                                                                   |                   |                   |             |                                                                     |             |                   |                   |
| White                                             | 312 (63.5)                                                                        | 166 (65.6)        | 107 (66.9)        | 71 (62.3)   | 316 (67.5)                                                          | 74 (72.5)   | 482 (65.4)        | 150 (71.4)        |
| Black or African American                         | 27 (5.5)                                                                          | 12 (4.7)          | 8 (5.0)           | 7 (6.1)     | 33 (7.1)                                                            | 6 (5.9%)    | 42 (5.7)          | 8 (3.8)           |
| Asian American                                    | 136 (27.7)                                                                        | 68 (26.9)         | 42 (26.3)         | 33 (28.9)   | 102 (21.8)                                                          | 20 (19.6%)  | 187 (25.4)        | 48 (22.9)         |
| Indian or Alaska Native                           | 1 (0.2)                                                                           | 0 (0.0)           | 1 (0.6)           | 0 (0.0)     | 2 (0.4)                                                             | 0 (0.0)     | 2 (0.3)           | 0 (0.0)           |
| Hawaiian or other Pacific Islander                | 4 (0.8)                                                                           | 0 (0.0)           | 0 (0.0)           | 0 (0.0)     | 1 (0.2)                                                             | 0 (0.0)     | 2 (0.3)           | 0 (0.0)           |
| Other                                             | 11 (2.2)                                                                          | 7 (2.8)           | 2 (1.3)           | 3 (2.6)     | 14 (3.0)                                                            | 2 (2.0)     | 22 (3.0)          | 4 (1.9)           |
| Missing data                                      | 1                                                                                 | 2                 | 0                 | 0           | 0                                                                   | 1           | 1                 | 3                 |
| Mean duration of AD, y (SD)                       | 28.4 (15.6)                                                                       | 28.8 (14.1)       | 24.5 (13.6)       | 27.8 (13.9) | 27.7 (14.8)                                                         | 30.0 (16.9) | 28.9 (15.4)       | 30.2 (15.0)       |
| Mean BSA involvement with AD, % (SD)              | 58.4 (25.2)                                                                       | 57.8 (25.3)       | 52.5 (25.0)       | 52.8 (22.7) | 52.5 (23.8)                                                         | 51.0 (23.7) | 56.3 (24.5)       | 57.6 (25.7)       |
| IGA, n (%)                                        |                                                                                   |                   |                   |             |                                                                     |             |                   |                   |
| IGA 3 (moderate)                                  | 202 (41.1)                                                                        | 112 (43.9)        | 81 (50.6)         | 62 (54.4)   | 238 (50.9)                                                          | 53 (51.5)   | 325 (44.0)        | 88 (41.3)         |
| IGA 4 (severe)                                    | 290 (58.9)                                                                        | 143 (56.1)        | 79 (49.4)         | 52 (45.6)   | 230 (49.1)                                                          | 50 (48.5)   | 413 (56.0)        | 125 (58.7)        |
| Mean EASI (SD)                                    | 34.7 (14.6)                                                                       | 34.5 (14.1)       | 32.0 (14.0)       | 32.2 (12.4) | 32.6 (14.1)                                                         | 31.8 (13.3) | 34.2 (14.5)       | 34.5 (14.5)       |
| Mean weekly average worst daily pruritus NRS (SD) | 8.0 (1.4), n=486                                                                  | 8.0 (1.3), n=253  | 7.8 (1.3), n=159  | 7.7 (1.4)   | 7.7 (1.5), n=466                                                    | 7.7 (1.3)   | 7.9 (1.5), n=734  | 8.0 (1.3), n=211  |
| Mean DLQI (SD)                                    | 17.8 (7.3), n=485                                                                 | 18.0 (6.9), n=252 | 15.6 (7.6), n=158 | 16.2 (6.9)  | 17.6 (6.8), n=465                                                   | 17.7 (6.3)  | 18.0 (6.9), n=732 | 18.7 (6.5), n=211 |

<sup>a</sup>EASI-50, ≥3-point improvement in itch NRS, or ≥4-point improvement in DLQI.

AO: as observed. AD: atopic dermatitis. BSA: body surface area. DLQI: Dermatology Life Quality Index. EASI: Eczema Area and Severity Index. EASI-50: at least 50% improvement in EASI. IGA: Investigator's Global Assessment. NRI: non-responder imputation. NRS: numeric rating scale. n: number of subjects in analysis set. PBO: placebo. Q2W: every 2 weeks. SD: standard deviation. Tralo: tralokinumab. USPI: United States Prescribing Information.

**Table S5** Week 16 outcomes for ECZTRA 1 and 2 non-responders at Week 16 (USPI population)

|                                                         | NRI dataset          |                   | AO dataset <sup>a</sup> |                   |
|---------------------------------------------------------|----------------------|-------------------|-------------------------|-------------------|
|                                                         | Tralo<br>(N=960)     | PBO<br>(N=358)    | Tralo<br>(N=898)        | PBO<br>(N=327)    |
| <b>EASI</b>                                             | 960                  | 358               | 896                     | 327               |
| Mean (SD)                                               | 24.5 (16.7)          | 30.0 (15.7)       | 17.7 (13.8)             | 23.6 (14.8)       |
| Absolute change from baseline, Mean (SD)                | -9.2 (12.6)          | -3.7 (10.3)       | -16.1 (13.5)            | -10.1 (14.5)      |
| <b>weekly average worst daily pruritus NRS, n</b>       | 952                  | 356               | 824                     | 300               |
| Mean (SD)                                               | 6.5 (2.4)            | 7.3 (2.1)         | 5.4 (2.4)               | 6.1 (2.3)         |
| Absolute change from baseline, Mean (SD)                | -1.4 (2.1)           | -0.6 (1.6)        | -2.5 (2.2)              | -1.8 (2.2)        |
| <b>eczema-related sleep interference (sleep) NRS, n</b> | 952                  | 356               | 824                     | 300               |
| Mean (SD)                                               | 5.7 (2.8)            | 6.5 (2.5)         | 4.4 (2.7)               | 5.2 (2.7)         |
| Absolute change from baseline, Mean (SD)                | -1.4 (2.2)           | -0.6 (1.7)        | -2.6 (2.5)              | -1.9 (2.5)        |
| <b>SCORAD, n</b>                                        | 960                  | 358               | 896                     | 326               |
| Mean (SD)                                               | 57.6 (20.4)          | 65.8 (17.4)       | 47.9 (18.8)             | 56.1 (18.5)       |
| Absolute change from baseline, Mean (SD)                | -13.7 (17.1)         | -6.1 (13.9)       | -23.5 (17.3)            | -15.8 (19.1)      |
| <b>DLQI, n</b>                                          | 955                  | 355               | 870                     | 318               |
| Mean (SD)                                               | 13.1 (8.4)           | 15.7 (8.1)        | 9.5 (7.3)               | 11.8 (7.8)        |
| Absolute change from baseline, Mean (SD)                | -4.5 (6.7),<br>n=952 | -2.2 (5.3), n=356 | -8.1 (7.3),<br>n=863    | -6.0 (7.5), n=317 |

<sup>a</sup>Fewer patients compared to NRI dataset since patients with missing observations were omitted.

AO: as observed. DLQI: Dermatology Life Quality Index. EASI: Eczema Area and Severity Index. NRI: non-responder imputation.

NRS: numeric rating scale. n: number of subjects in analysis set. PBO: placebo. SD: standard deviation. SCORAD: SCORing Atopic Dermatitis. Tralo: tralokinumab. USPI: United States Prescribing Information

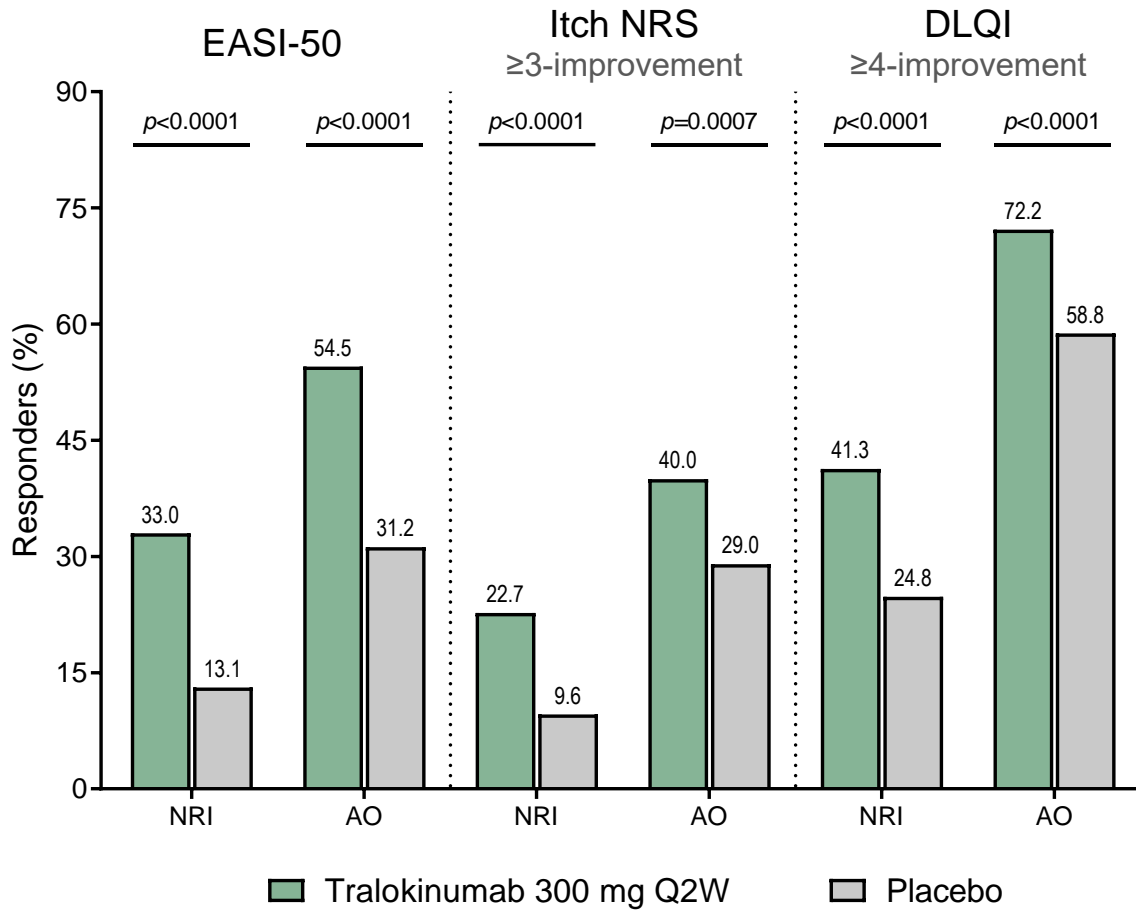

**Fig. S2** Greater proportion of tralokinumab-treated patients achieved clinically meaningful responses relative to placebo at Week 16 (USPI population). Patients who did not achieve IGA 0/1 at Week 16 and/or used rescue medication. *P*-values compare tralokinumab (NRI: n=960; AO: n=898) versus placebo (NRI: n=358; AO: n=327). AO: as observed. DLQI: Dermatology Life Quality Index. EASI: Eczema Area and Severity Index. EASI-50: at least 50% improvement in EASI. IGA: Investigator's Global Assessment. NRI: non-responder imputation. NRS: numeric rating scale. Q2W: every 2 weeks. USPI: United States Prescribing Information.



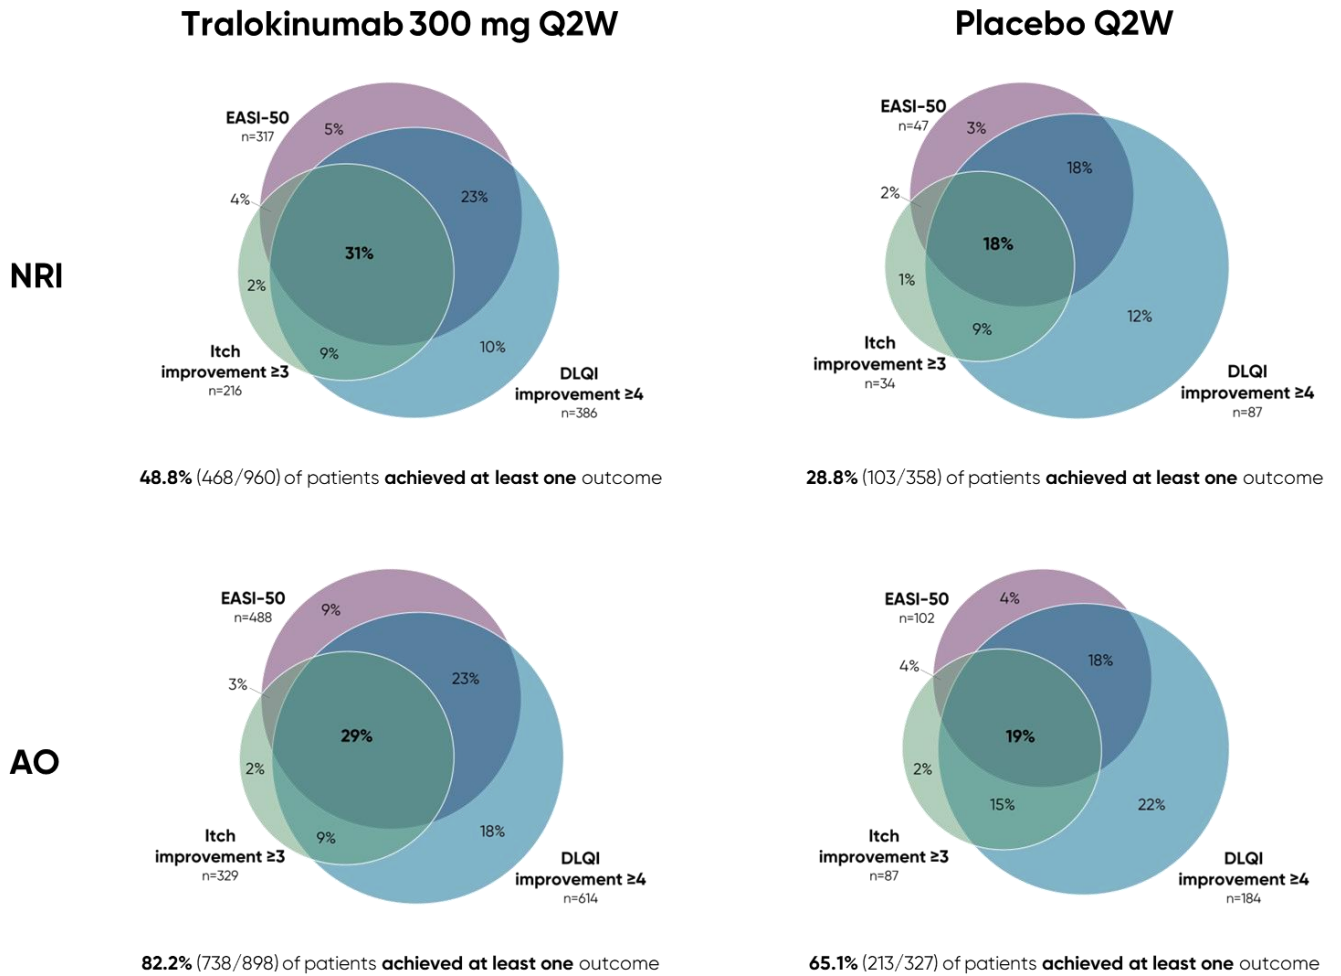

**Fig. S3** Greater proportion of tralokinumab-treated patients achieved all three measures of clinically meaningful response relative to placebo at Week 16 (USPI population). Patients who did not achieve IGA 0/1 at Week 16 and/or used rescue medication. AO: as observed. DLQI: Dermatology Life Quality Index. EASI: Eczema Area and Severity Index. EASI-50: at least 50% improvement in EASI. NRI: non-responder imputation. n: number of subjects in analysis set. Q2W: every 2 weeks. USPI: United States Prescribing Information.

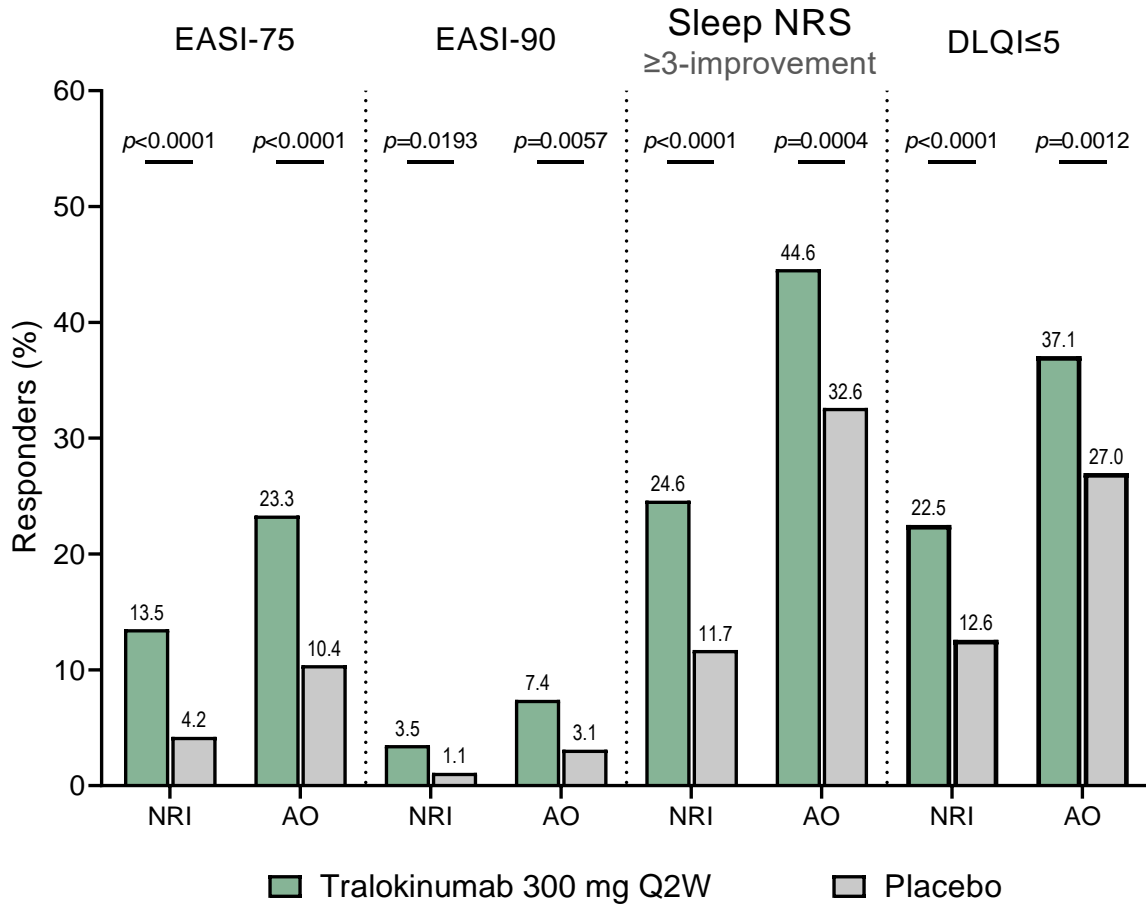

**Fig. S4** Greater proportion of tralokinumab-treated patients achieved EASI-75, EASI-90,  $\geq 3$ -point improvement in sleep NRS, and DLQI  $\leq 5$  relative to placebo at Week 16 (USPI population). Patients who did not achieve IGA 0/1 at Week 16 and/or used rescue medication. *P*-values compare tralokinumab (NRI: n=960; AO: n=898) versus placebo (NRI: n=358; AO: n=327). AO: as observed. EASI: Eczema Area and Severity Index. EASI-75: at least 75% improvement in EASI. EASI-90: at least 90% improvement in EASI. IGA: Investigator's Global Assessment. NRI: non-responder imputation. NRS: numeric rating scale. Q2W: every 2 weeks. USPI: United States Prescribing Information.
